1           Development of Resistance to 4'-Ethyne-2-Fluoro-2'-Deoxyadenosine (EFdA)  
2                           by WT and Nucleoside Reverse Transcriptase Inhibitor Resistant  
3                                           Human Immunodeficiency Virus Type 1  
4

5 Running Title – HIV resistance to EFdA  
6

7 Maria E. Cilento<sup>a</sup>, Eleftherios Michailidis<sup>b</sup>, Tatiana V. Ilina<sup>c</sup>, Eva Nagy<sup>c</sup>, Hiroaki Mitsuya<sup>d</sup>,  
8 Michael A. Parniak<sup>c,†</sup>, Philip R. Tedbury<sup>a</sup>, Stefan G. Sarafianos<sup>a,#</sup>,  
9

10 <sup>a</sup>Laboratory of Biochemical Pharmacology, Department of Pediatrics, Emory University  
11 School of Medicine, Atlanta, GA, USA.

12 <sup>b</sup>Laboratory of Virology and Infectious Disease, The Rockefeller University, New York,  
13 NY

14 <sup>c</sup>Department of Microbiology and Molecular Genetics, University of Pittsburgh School of  
15 Medicine, Pittsburgh, PA, USA

16 <sup>d</sup>Department of Refractory Viral Infections, National Center for Global Health & Medicine  
17 Research Institute, Tokyo, Japan; Experimental Retrovirology Section, HIV and AIDS  
18 Malignancy Branch, National Cancer Institute, National Institutes of Health, Bethesda,  
19 MD, USA; Department of Clinical Sciences, Kumamoto University Hospital, Kumamoto,  
20 Japan.

21 <sup>†</sup>Deceased

22 # Address correspondence to Stefan G. Sarafianos, [ssarafi@emory.edu](mailto:ssarafi@emory.edu)  
23

24 4'-ethynyl-2-fluoro-2'-deoxyadenosine (EFdA, MK-8591, islatravir) is a nucleoside  
25 reverse transcriptase translocation inhibitor (NRTTI) with exceptional potency against WT  
26 and drug-resistant HIV strains. However, HIV resistance to EFdA is not well  
27 characterized. We therefore developed resistance to EFdA by serial passages using  
28 progressively increasing concentrations of EFdA. The starting virus was either WT or  
29 clinically relevant NRTI-resistant viruses K65R, M184V, and D67N/K70R/T215F/K219Q).  
30 In all cases, the selected mutations included M184V. Additional mutations in the RT  
31 connection domain (R358K and E399K) and one mutation in the RNase H domain  
32 (A502V) were noted. Site-specific mutagenesis validated the role for M184V as the  
33 primary determinant for resistance to EFdA; none of the connection domain mutations  
34 contributed significantly to phenotypic resistance to EFdA. A novel EFdA resistance  
35 mutation was also observed in the background of M184V. The A114S/M184V  
36 combination of mutations imparted higher resistance to EFdA (~24-fold) than M184V (-8-  
37 fold) or A114S (~2-fold) alone. Virus fitness data suggested that A114S affects HIV fitness  
38 by itself and in the presence of M184V. This is consistent with biochemical experiments  
39 that showed decreases in the enzymatic efficiency ( $k_{cat}/K_m$ ) of WT RT vs. A114S (2.1-  
40 fold) and A114S/M184V/502V (6.5-fold), whereas there was no significant effect of A502V  
41 on RT or virus fitness. The observed EFdA resistance of M184V by itself and in  
42 combination with A114S combined with the strong published *in vitro* and *in vivo* data,  
43 confirm that EFdA is an excellent candidate as a potential HIV therapeutic.

44

## 45 INTRODUCTION

46 As of 2018, 37.9 million people worldwide are living with HIV/AIDS, with 1.7 million  
47 new HIV infections and 770,000 AIDS-related deaths annually (Mahy et al., 2019).  
48 However, AIDS-related morbidity and mortality rates have declined in recent years,  
49 largely due to the widespread use of highly-active antiretroviral therapy (HAART) (Mahy  
50 et al., 2019). HAART typically consists of a combination of two nucleoside reverse  
51 transcriptase inhibitors (NRTIs), along with a nonnucleoside reverse transcriptase  
52 inhibitor, protease inhibitor or an integrase inhibitor (Merluzzi et al., 2010). Azidothymidine  
53 (AZT), didanosine (ddI), lamivudine (3TC), emtricitabine (FTC), abacavir (ABC), and  
54 tenofovir (TFV) are the six NRTIs included in HAART regimens (Eggleton and Nagalli,  
55 2020; Menéndez-Arias, 2008; Merluzzi et al., 2010). However, the prevalence of HIV  
56 strains resistant to these compounds is rapidly increasing, both in treatment-experienced  
57 and newly-infected patients (Clutter et al., 2016; Eggleton and Nagalli, 2020; Larder et  
58 al., 1995; Little et al., 2002; Pennings, 2013; Wainberg et al., 2011). High-level resistance  
59 to AZT generally requires multiple mutations, including D67N, K70R, T215F, and K219Q  
60 (Kellam et al., 1992; Larder and Kemp, 1989; Menéndez-Arias, 2008; Nakata et al., 2007),  
61 while an M184I/V mutation grants resistance to both 3TC and FTC (Menéndez-Arias,  
62 2008; Petrella et al., 2004; Schinazi et al., 1993; Tisdale et al., 1993). Meanwhile, the  
63 K65R mutation imparts some resistance to TFV (Brenner and Coutsinos, 2009; Margot  
64 et al., 2002; Miller, 2004; Naeger and Struble, 2006). Also, of great concern is the  
65 emergence of virus strains with cross-resistance to multiple NRTIs, which can limit  
66 treatment options following viral escape from first-line HAART (Eggleton and Nagalli,  
67 2020). M184V strains show resistance to ddI and abacavir, while mutations selected by

68 AZT are resistant to FTC, and K65R has reduced sensitivity to ddl, 3TC, and FTC (Bazmi  
69 et al., 2000; Brenner and Coutsinos, 2009; Menéndez-Arias, 2008; Miller, 2004; Zhang et  
70 al., 1994). The currently available NRTIs can also display toxicity and side effects  
71 (Brinkman et al., 1999, 1998; Brinkman and Kakuda, 2000; Eggleton and Nagalli, 2020;  
72 Lewis et al., 2003). Additionally, the success of antiretroviral regimens at preventing HIV-  
73 1 infection has moved attention to the question of compliance, and increased the interest  
74 in therapeutic agents that may be suitable for long interval dosing (Cihlar and Fordyce,  
75 2016; Margolis and Boffito, 2015). All of the above are reasons there is a need for the  
76 development of novel therapeutic agents.

77         Several studies have investigated a group of novel 4'-substituted NRTIs, the most  
78 promising of which is 4'-ethynyl-2-fluoro-2'-deoxyadenosine (EFdA, MK-8591, or  
79 islatravir) (reviewed at (Markowitz and Sarafianos, 2018)). EFdA is a deoxyadenosine  
80 analog with an ethynyl group at the 4' carbon of the ribose and a fluorine on the 2-position  
81 of the adenine base (Kageyama et al., 2011; Kirby et al., 2013, 2011; Nakata et al., 2007).  
82 EFdA also retains a 3'-OH, unlike all other HIV NRTIs currently approved for therapeutic  
83 use. The presence of the 3'-OH improves the recognition of EFdA as a substrate by  
84 cellular kinases such as deoxycytidine kinase (Gallois-Montbrun et al., 2002; Kawamoto  
85 et al., 2008a; Nakata et al., 2007) and HIV reverse transcriptase (RT) dNTP binding  
86 domain (Michailidis et al., 2014a, 2009; Salie et al., 2016); this may contribute to the  
87 efficient production of EFdA-triphosphate (EFdA-TP) and the efficient incorporation of  
88 EFdA-monophosphate (EFdA-MP) into nascent HIV DNA during reverse transcription.  
89 Deamination of EFdA by cellular enzymes is greatly reduced by the 2-fluorine substitution,  
90 increasing the intracellular half-life of the molecule compared to similar non-halogenated

91 compounds (Kawamoto et al., 2008a; Kirby et al., 2013). The 4'-ethynyl group of EFdA  
92 interacts with a hydrophobic pocket in the active site of RT, affecting translocation and  
93 extension of the DNA primer, despite the available 3'-OH (Michailidis et al., 2014b;  
94 Muftuoglu et al., 2014; Salie et al., 2016). Therefore, EFdA is termed a nucleoside RT  
95 translocation inhibitor (NRTTI). EFdA has demonstrated a high level of potency against  
96 both WT (wild-type) HIV-1, HIV-2, and NRTI resistant strains (Kawamoto et al., 2008a;  
97 Maeda et al., 2014; Oliveira et al., 2017; Wu et al., 2017). The NRTI-resistant virus, K65R,  
98 showed hypersensitivity to EFdA (Maeda et al., 2014; Michailidis et al., 2013). EFdA has  
99 shown *in vivo* potency against both HIV and SIV in humanized mouse (Hattori et al., 2009;  
100 Shanmugasundaram et al., 2016; Stoddart et al., 2015) and non-human primate models,  
101 respectively (Markowitz et al., 2020; Murphey-Corb et al., 2012; Stoddart et al., 2015).  
102 EFdA imparts minimal toxicity in the animal models as well as in all *in vitro* assays, due  
103 to minimal inhibition of human DNA polymerases, leading to a high selectivity index  
104 (Shanmugasundaram et al., 2016; Sohl et al., 2012; Stoddart et al., 2015). Perhaps most  
105 importantly, EFdA is being tested for once-week and once-monthly dosing regimens  
106 (Barrett et al., 2018; Grobler et al., 2019; J. et al., 2017, 2016). Taken together, these  
107 results suggest that EFdA has great promise as a potential therapeutic agent.

108 Little is known about the capacity of HIV to develop high-level resistance to EFdA,  
109 and what mutations may allow the virus to escape inhibition. M184V in RT decreases  
110 sensitivity to EFdA (Kawamoto et al., 2008a; Kodama et al., 2001; Maeda et al., 2014;  
111 Nakata et al., 2007; Oliveira et al., 2017; Yang et al., 2008). M184V, along with I142V and  
112 T165R, was also selected during passage of WT virus with the parental compound, EdA  
113 (Kawamoto et al., 2008a). While an I142V/T165R/M184V virus had a 22-fold increase in

114 resistance to EFdA relative to WT, it is uncertain whether these mutations would arise  
115 during passage of virus in EFdA itself, or if novel mutations conferring even greater  
116 resistance are possible. It is also not well understood how resistance to EFdA develops  
117 in virus strains with specific pre-existing NRTI resistance mutations, which would be  
118 relevant to its potential value as salvage therapy for patients failing first-line HAART.  
119 Finally, there is no significant information on the biochemical basis of EFdA resistance  
120 and it is not known whether viruses with reduced sensitivity to EFdA would be cross-  
121 resistant to the NRTIs currently used in therapy.

122         In this study, we explored the influence of pre-existing NRTI resistance-associated  
123 mutations, and identified several novel mutations, associated with development of  
124 resistance to EFdA. We selected viruses resistant to EFdA by serial passage of HIV-1,  
125 initiating passages with WT virus, or with virus resistant to TFV, 3TC/FTC or AZT. We  
126 found that M184V was included in all selected EFdA-resistant strains. Mutations also  
127 appeared in the RT connection domain (R358K and E399K) and the RNase H domain  
128 (A502V), although these changes did not appear to compensate for loss of fitness nor  
129 significantly affect resistance when alone. We were able to identify a double mutant virus  
130 with a moderate-level of resistance, A114S/M184V (~25-fold).

131

132 **RESULTS**

133 **Virus breakthrough during serial passage of viruses in increasing EFdA**  
134 **concentrations.** Serial passages were initiated by infecting MT-2 cells with WT (xxLAI),  
135 K65R, M184V or D67N/K70R/T215F/K219Q stock virus in the presence of EFdA and  
136 followed as described in Materials and Methods. All EFdA-selected viruses, regardless of  
137 the initial strain or number of passages, induced  $\geq 75\%$  syncytia formation in untreated  
138 MT-2 cells within 7 days of infection.

139 The ability of the viruses to grow in the presence of EFdA was assessed by time  
140 to viral breakthrough (defined as 75% syncytia formation) at each passage. This time to  
141 breakthrough and the concentration of EFdA in each passage is shown in Figure 1. For  
142 WT, M184V, and D67N/K70R/T215F/K219Q, virus breakthrough typically occurred after  
143 approximately 7 days. As EFdA concentrations were raised in passages 8 and 9, time to  
144 virus breakthrough increased, until virus replication was no longer observed in passage  
145 10. Passage 10 corresponded to an EFdA concentration of 550 – 800 nM (Figure 1A, C  
146 and D).

147 The behavior of K65R deviated from the other mutants studied in two ways. Firstly,  
148 there was a reduction in the time to breakthrough from passages 1 – 4, likely associated  
149 with the loss of K65R that was lost as early as P<sub>2</sub> (data not shown) and was not detected  
150 at passage 6 (Table 1, Figure 1), which confers hypersensitivity to EFdA (Michailidis et  
151 al., 2013). The time to breakthrough then increased as EFdA concentrations were raised,  
152 as seen with other viruses. These passages eventually terminated at passage 16 at a  
153 final concentration of ~35,000 nM EFdA (Figure 1B).

154 In every case, the passaged viruses were able to replicate in greater EFdA  
155 concentrations than the parental virus, indicating that some degree of EFdA resistance  
156 had developed. The most significant resistance appeared in the passages initiated with  
157 K65R virus.

158 **Infectivity of EFdA-passaged virus supernatants.** To determine whether the  
159 passaged viruses had undergone significant changes in infectivity, independent of their  
160 potential resistance to EFdA, the infectivity of passaged isolates was compared to the  
161 infectivity of the unpassaged starting virus ( $P_0$ ), using the P4R5 MAGI reporter cell line in  
162 the absence of EFdA. For WT-, K65R- and M184V-derived viruses, the passaged strains  
163 demonstrated higher infectivity than the unpassaged  $P_0$  (Figure 2A - C). The  
164 D67N/K70R/T215F/K219Q viruses showed similar replication efficiency to the parental  
165 virus (Figure 2D). These increases in viral infectivity suggest that an increase in overall  
166 viral fitness may contribute to enhanced replication in the presence of EFdA for WT-,  
167 K65R- and M184V-derived viruses.

168 **Dose response of EFdA-passaged viruses to EFdA.** To evaluate the degree of  
169 resistance selected in the passaging experiments, sensitivity to EFdA was determined for  
170 virus supernatants from  $P_6$  onwards. Data are presented for the viruses obtained from  $P_6$ ,  
171  $P_9$  and, in one case,  $P_{10}$ .  $P_6$  was the first passage for which extensive sequencing analysis  
172 was performed,  $P_9$  was the effective endpoint for the WT-, M184V- and  
173 D67N/K70R/T215F/K219Q-derived viruses, and  $P_{10}$  was chosen as the endpoint for the  
174 K65R-derived strain. For each of the viruses studied, the later passage viruses  
175 demonstrated increased  $EC_{50}$  values compared to WT and earlier passage viruses;  
176 however, the final  $EC_{50}$  increased compared to starting, as expected (Figure 3 A-D).



177           **Development of amino acid mutations in reverse transcriptase during serial**  
178 **passage of viruses with EFdA.** Clonal sequencing confirmed the identity of the P<sub>0</sub> stock  
179 viruses. Similar sequencing was carried out on clones from various passages to identify  
180 any changes in RT that may have arisen during replication in the presence of EFdA. Table  
181 1 summarizes data for P<sub>6</sub> and P<sub>9</sub> isolates for all parental viruses, and viruses from P<sub>6</sub>, P<sub>9</sub>,  
182 and P<sub>10</sub> for K65R.

183           The WT P<sub>6</sub> population sequencing revealed only M184I (Table 1); by P<sub>9</sub>,  
184 approximately 30% of sequences were M184I, 30% were M184I/E399K, and the  
185 remainder was divided between M184V and WT. Consistent with the initial passage data,  
186 sequencing data showed that all clones of the K65R P<sub>6</sub> virus reverted the K65R mutation  
187 back to WT. The reversion occurred rapidly, as K65R was not seen in the P<sub>2</sub> population.  
188 Over 90% of clones additionally contained M184I, with the remainder M184V. Sequencing  
189 data also showed that the proportion of M184V increased to ~one-quarter of the  
190 population by P<sub>8</sub>. The virus harvested following P<sub>9</sub> had a more heterogeneous population,  
191 with most sequences containing M184V/A502V or M184I. By P<sub>10</sub>, the diversity decreased  
192 dramatically, and A114S/M184V/A502V became the dominant sequence. A114S/M184V  
193 and A114S/A502V were found at much lower frequency. The A114S/M184V/A502V  
194 mutation remained dominant through subsequent passages, reaching 100% of  
195 sequences in P<sub>12</sub> and P<sub>13</sub>.

196           The only novel mutation gained during passages that started with M184V was  
197 R358K, which became increasingly dominant as passaging progressed. Sequencing of  
198 the virus that broke through P<sub>10</sub> revealed that two-thirds of the sequences had R358K

199 alone, while 27.3% of the population contained a combination of R358K and A502V in  
200 addition to the present M184V mutation.

201 Passage of the D67N/K70R/T215F/K219Q virus led to the rapid emergence of  
202 M184V (dominant in passage 6). This was joined by E399K (M184V/E399K was dominant  
203 in passage 9) in late passages. None of the starting mutations were lost during passage.

204 These passaging and sequencing experiments revealed a variety of mutations  
205 associated with EFdA resistance. Independent of the starting sequence, resistance was  
206 associated with mutations at residue M184, and the highest levels of resistance required  
207 an additional A114S mutation.

208 **Sensitivity of molecular clone viruses to EFdA.** To confirm that the mutations  
209 identified by sequencing were capable of conferring resistance to EFdA, molecular clones  
210 representing the major mutant genotypes that developed during passage in EFdA were  
211 produced in a WT (NL4-3) backbone and characterized for their infectivity relative to WT.  
212 Individual mutants A114S, R358K, E399K, and A502V had no effect on resistance to  
213 EFdA. The only resistant individual mutant was M184V, which conferred about 8-fold  
214 resistance to EFdA, consistent with previous reports (Kawamoto et al., 2008b; Oliveira et  
215 al., 2017) (Figure 4). Addition of the A114S further increased the EFdA resistance, as  
216 seen in the cases of A114S/M184V (24-fold), A114S/M184V/R358K (28-fold), and  
217 A114S/M184V/A502V (25-fold). The R358K or A502V mutations by themselves had  
218 almost no effect on EFdA resistance (Figure 4). These data confirm that several of the  
219 mutations identified in the passaged viruses do confer resistance to EFdA, with the  
220 highest levels of resistance found in the concomitant presence of the A114S and M184V  
221 mutations.

222           **Replication characteristics of molecular clone viruses.** To determine if the  
223 mutations had an impact on viral fitness, viruses were tested in single cycle replication  
224 assays. There were no statistically significant differences in the fitness of connection  
225 domain mutants R358K and E399K or RNase H mutant A502V. However, there was a  
226 decrease in fitness of the A114S-containing mutants, A114S/M184V and  
227 A114S/M184V/A502V, as compared to WT (Figure 5). This is consistent with the  
228 biochemical data below, where a decrease in specific activity was observed for the RTs  
229 with the corresponding mutations.

230           **Steady State Kinetics and EFdA susceptibility of Mutant Reverse**  
231 **Transcriptases.** In order to further understand the effect of the mutations on the DNA  
232 polymerase activity of RT, we performed steady state kinetics to determine the catalytic  
233 efficiency ratio,  $k_{cat}/K_m$ , for various RT mutants. We cloned, expressed, and purified the  
234 mutant RTs listed in Table 2. We found that in the presence of the A114S mutation there  
235 was a consistent decrease in the catalytic efficiency ratio  $k_{cat}/K_m$  compared to WT RT: a  
236 2.1 decrease for A114S and a 6.5 for A114S/M184V/A502V. Of note, the  $k_{cat}/K_m$  for the  
237 A502V and M184V single mutants was comparable to that of the WT enzyme (Table 2).

## 238 **DISCUSSION**

239 NRTIs are the most widely used therapeutics to treat HIV infection. As such, NRTI-  
240 resistant HIV variants are becoming increasingly prevalent in the HIV-1-infected  
241 population. EFdA has potential as salvage therapy for patients infected with NRTI-  
242 resistant mutants of HIV and as first line therapy for naïve HIV-infected individuals, owing  
243 to its potential suitability for long interval dosing. As such, we were interested in identifying  
244 and characterizing EFdA-resistant mutations that might arise during exposure of WT HIV,  
245 and especially NRTI-resistant virus variants, to EFdA.

246 Regardless the type of starting genotype virus, M184I/V ended up consistently to  
247 be the predominant mutation that arose during passages through EFdA. The M184V  
248 mutation confers high-level resistance to both 3TC and FTC (Petrella et al., 2004;  
249 Schinazi et al., 1993; Tisdale et al., 1993) (Sarafianos et al., 1998), but only low-level  
250 resistance to EFdA (Kawamoto et al., 2008a; Maeda et al., 2014). Our present data  
251 confirm the latter, with M184V conferring only 8-fold resistance to EFdA. Interestingly,  
252 M184V is also the primary resistance mutation selected during serial passage of WT HIV  
253 with related compounds EdA and Ed4T suggesting that M184 is critical to the activity of  
254 4'-ethynyl modified nucleoside analogues (Kawamoto et al., 2008a; Nitanda et al., 2005).

255 Due to the widespread use of 3TC and FTC in HIV treatment, the M184V mutation  
256 is already present in many treatment-experienced patients. Since this mutation confers  
257 relatively low-level resistance to EFdA, we were interested to determine whether M184V  
258 virus could develop increased resistance during replication in the presence of EFdA.

259 The D67N/K70R/T215F/K219Q mutant, is highly resistant to AZT (Kellam et al.,  
260 1992; Larder and Kemp, 1989). Similar to another AZT-resistant mutant, M41L/T215Y,

261 that was previously shown to display marginal resistance to EFdA (Kawamoto et al.,  
262 2008a), we found that D67N/K70R/T215F/K219Q had a 1.8-fold increase in EFdA  
263 resistance compared to WT. As we have previously shown, the excision unblocking  
264 mechanism of resistance is not a major challenge for EFdA: although EFdA can indeed  
265 be excised, the efficiency of reincorporation is so high, that the net result is no significant  
266 overall excision (Michailidis et al., 2014b). The K65R mutation confers resistance to TFV  
267 and is the mutation responsible for virological failure in TFV-based therapies. K65R is  
268 also cross-resistant or selected during therapy with ABC, ddI, and 3TC/FTC (Bazmi et al.,  
269 2000; Brenner and Coutsinos, 2009; Eggleton and Nagalli, 2020; Miller, 2004; Naeger  
270 and Struble, 2006; Zhang et al., 1994). We previously showed that the K65R variant is  
271 hypersensitive to EFdA, with up to five-fold lower EC<sub>50</sub> compared to WT (Kawamoto et  
272 al., 2008a; Maeda et al., 2014; Michailidis et al., 2013). Our current results are consistent  
273 with this finding, as the K65R mutation was rapidly lost during passage in EFdA. The rapid  
274 reversion of this mutation leads not only to a reduction in sensitivity to EFdA, but also  
275 confers increased replication fitness to the virus. Collectively, the K65R, M184V, and  
276 D67N/K70R/T215F/K219Q, possess either increased sensitivity to EFdA, or slight (less  
277 than 10-fold) increased resistance.

278 Our results demonstrate the difficulty of selecting for resistance to EFdA. Even  
279 when starting the passages using different starting genotypic backgrounds, there was  
280 consistent appearance of the M184V mutation that by itself gave modest resistance 8-  
281 fold. Here we have identified a novel EFdA resistance mutation, A114S, that when added  
282 to M184V enhances EFdA resistance to about 25-fold. Importantly, this mutation,  
283 especially in the background of M184V, appears to have a negative impact on viral fitness.

284 This was confirmed using both viral fitness data as well as biochemical data with purified  
285 enzymes (Figure 5 and table 2). Specifically, it seems that the decrease in fitness is likely  
286 due to decreased binding of incoming dNTPs, as judged in all cases where A114S  
287 mutation was present. As both 184 and 114 residues are located at opposing sides of the  
288 EFdA binding pocket, we speculate that the bulkier mutant residues (V184 and S114)  
289 impinge into the substrate envelope of the 4'-ethynyl pocket, thus causing decrease in  
290 dNTP binding (increase in  $K_m$ ) and decrease in viral fitness.

291 In general, it appears that the development of EFdA resistance begins with  
292 mutations in the binding site; in our experiments, as well as in a previous report (Maeda  
293 et al., 2014), the initial mutation was M184I. We found that M184I was replaced at later  
294 passages by M184V, a mutation with superior replication capacity (Frost et al., 2000;  
295 Keulen et al., 1997; Schuurman et al., 1995). RT connection domain mutations (R358K  
296 and E399K) were selected at later passages. These residues are proximal to G359-A360  
297 and K395-E396, respectively, in the RNase H primer grip region that interacts with the  
298 DNA primer strand (Julias et al., 2003; Sarafianos et al., 2001). While R358 may form a  
299 weak hydrogen bond with the phosphate backbone of the primer strand (Ding et al.,  
300 1998), any effect of R358K or E399K will only be minor, and likely through minor  
301 structural adjustments affecting the position of nearby residues. Studies have  
302 demonstrated that R358K is selected both in NRTI-treated patients and during passage  
303 with NRTIs in tissue culture (Brehm et al., 2007; Delviks-Frankenberry et al., 2008;  
304 Lengruher et al., 2011; Tachedjian et al., 1998; von Wyl et al., 2010). However, any  
305 contribution of R358K to NRTI resistance is minimal and clinically it is likely selected as  
306 a pre-existing polymorphism, as it is present in 7.1% of treatment-naïve patients (Rhee,

307 2003; von Wyl et al., 2010). E399 is located within a cluster of several highly conserved  
308 tryptophan residues that are involved in RT dimerization (Chiang et al., 2012; Tachedjian  
309 et al., 2003), so E399K may have very small effects on stabilizing the heterodimer RT.  
310 We found no significant variation in EFdA resistance between M184V/E399K or  
311 M184V/R358K and M184V alone. These results indicate that neither R358K nor E399K  
312 contribute directly to EFdA resistance. We initially considered that these mutations might  
313 provide a fitness benefit to the mutants when added to the M184V background, potentially  
314 compensating for fitness costs associated with the acquisition of M184V (Wainburg, 2004;  
315 Xu et al., 2011). However, we did not observe improved fitness in our single round  
316 replication assays.

317 A further late-appearing mutation was A502V, which emerged during passaging of  
318 K65R. Unlike R358 and E399 that are located in the connection subdomain of RT, A502  
319 is located in the RNase H domain, near residues Y501 and I505, both of which interact  
320 with the DNA primer strand as part of the RNase H primer grip region (Sarafianos et al.,  
321 2001). Again, A502V does not appear to contribute to EFdA resistance, as the  
322 M184V/A502V clone did not have significantly lower sensitivity than M184V/E399K or  
323 M184V/R358K. The M184V/A502V mutant subsequently acquired an A114S mutation,  
324 which coincided with a significant increase in EFdA resistance. While the A114S mutation  
325 has never been reported in the context of EFdA resistance, it is associated with resistance  
326 to both foscarnet and AZT *in vitro*, but may increase sensitivity to AZT *in vivo* by affecting  
327 the enzyme processivity and pyrophosphorolysis rates (Arion et al., 2000; Larder et al.,  
328 2006, 1987).

329 A114 is part of a group of residues in the dNTP/EFdA-TP binding site, including  
330 A113, Y115, Q151, and M184, which interact with the 3'-OH of incoming dNTPs (Cases-  
331 Gonzalez and Menéndez-Arias, 2005; Harris et al., 1998; Van Cor-Hosmer et al., 2012).  
332 While the main chain amide of A114 interacts with the dNTP triphosphate, the alanine  
333 side chain protrudes towards the 3'-OH of the sugar moiety (Cases-Gonzalez and  
334 Menéndez-Arias, 2005; Huang et al., 1998; Menéndez-Arias, 2008). The A114S mutation  
335 has a longer side chain, which extends closer to the 3'-OH of an incoming dNTP and  
336 reduces the available space in the binding pocket and can thus increase selectivity for  
337 the correct dNTP. Consistent with our data, the A114S mutation was also previously  
338 observed to decrease the DNA polymerase activity of RT (Cases-Gonzalez and  
339 Menéndez-Arias, 2005; Van Cor-Hosmer et al., 2012). Furthermore, the side chain of  
340 A114 forms part of a hydrophobic pocket, along with Y115, M184, F160, and D185, which  
341 interacts with the 4'-ethynyl group of molecules such as EFdA (Salie et al., 2016) and  
342 4'Ed4T-TP (Michailidis et al., 2009; Yang et al., 2008). M184V may alter the shape of this  
343 pocket, causing steric hindrance with the 4'-ethynyl and reducing the affinity of RT for  
344 molecules with this functional group (Yang et al., 2008). A114S may also alter the shape  
345 at the opposite side of the hydrophobic pocket. By itself, the A114S molecular clone  
346 demonstrated a modest increase in EFdA resistance relative to WT. Higher resistance  
347 (~24-fold) was observed when A114S and M184V appeared together. This could be due  
348 to both synergistically interfering with the hydrophobic pocket, thus disrupting the 4'-  
349 ethynyl from stabilizing in the hydrophobic pocket and greatly reducing the enzyme affinity  
350 for EFdA. It is also possible that the A114S mutation contributes to a reversal of the  
351 translocation impairment imposed by EFdA after its incorporation in the primer terminus.



352 Nevertheless, A114S-containing mutants may not be a major problem in patients; A114  
353 mutations are rarely seen in clinical samples. Indeed, as of June 2012, only 21 sequences  
354 in the Stanford HIV Drug Resistance Database have mutations at this residue, only one  
355 of which is A114S (Rhee, 2003).

356 A major concern when introducing any new NRTI to clinical use is the potential for  
357 cross-resistance with current NRTIs. Our results confirm that EFdA drives the selection  
358 of M184I/V, producing virus with high-level cross-resistance to both 3TC and FTC.  
359 However, EFdA is a potent inhibitor, even against M184I/V mutants; it retains the ability  
360 to inhibit replication of these mutants at therapeutic doses. Conversely, M184I/V  
361 increases AZT sensitivity in both WT and AZT-resistant backgrounds (Boucher et al.,  
362 1993; Boyer et al., 2002; Larder et al., 1995; Tisdale et al., 1993).

363 The selection and characterization of EFdA resistance mutations through viral  
364 passage revealed the difficulty in identifying mutations that confer high-level resistance  
365 to EFdA. Although mutations at M184 were selected, they conferred less than 10-fold  
366 resistance. In our experiments, the development of greater resistance to EFdA required  
367 the combination of multiple mutations, including both M184V and A114S. These changes  
368 allowed for enhanced resistance to EFdA.

369 In summary, the data presented here demonstrate that a significant barrier exists  
370 to HIV developing high-level resistance to EFdA. In addition, viruses that do develop high-  
371 level resistance to EFdA become highly sensitized to other NRTIs. These results  
372 demonstrate that EFdA has potential to be a highly effective therapeutic.

373

374

## 375 **MATERIALS AND METHODS**

376 **Reagents.** EFdA was synthesized by Life Chemicals (Burlington ON, Canada).  
377 Stock solutions (10 mM) of EFdA was prepared in dimethyl sulfoxide (DMSO) and stored  
378 in aliquots at -20 °C. MT-2 cells (Boufford and Spongberg, 1983; Charneau et al., 1994;  
379 Haertle et al., 1988) were cultured in RPMI 1640 medium (Mediatech Inc, Manassas, VA),  
380 supplemented with 10% fetal bovine serum (FBS) (HyClone, Logan, UT), 2 mM L-  
381 glutamine (Mediatech Inc) and 100 U/ml penicillin, 100 µg/ml streptomycin (Mediatech  
382 Inc). P4-R5 MAGI cells were cultured in DMEM (Mediatech Inc), supplemented with 10%  
383 FBS, 2 mM L-glutamine, 100 U/ml penicillin, 100 µg/ml streptomycin and 1 µg/mL  
384 puromycin. HEK-293 cells (Graham et al., 1977) and HEK-293/17 (Pear et al., 1993) were  
385 cultured in DMEM supplemented with 10% FBS, L-glutamine and penicillin/streptomycin.  
386 TZM-GFP cells (Derdeyn et al., 2000; Platt et al., 2009, 1998; Rosa et al., 2015; Takeuchi  
387 et al., 2008; Wei et al., 2002) were cultured in DMEM (Corning) supplemented with 10%  
388 Serum Plus, 2 mM L-glutamine (ThermoFisher, Waltham, MA), 100 U/ml  
389 penicillin/streptomycin (ThermoFisher). Jurkat LTR-GFP CCR5+ Cells (JLTRG-R5)  
390 (Kutsch et al., 2004; Ochsenbauer-Jambor et al., 2006) were cultured in RPMI 1640  
391 medium (Cytiva Life Sciences, Marlborough, MA) supplemented with 10% FBS and 100  
392 U/mL penicillin/streptomycin.

393 **Generation of virus stocks and molecular clones.** Initial K65R, M184V, and  
394 D67N/K70R/T215F/K219Q viruses were generated by site-directed mutagenesis on an  
395 xxLAI HIV-1 backbone using the QuikChange XL Site-Directed Mutagenesis kit (Agilent  
396 Technologies Inc, Santa Clara, CA), according to the manufacturer's protocols.  
397 Subsequently,  $6 \times 10^5$  293-T cells were transfected with 10 µg of viral DNA using the

398 PrimeFectimine Mammalian Transfection Reagent (PrimGen, Oak Park, IL). After 72 h  
399 incubation, HEK-293/T cell supernatants were harvested, filtered and used to infect  $1.8$   
400  $\times 10^6$  MT-2 cells. Infected MT-2 cells were incubated at 37 °C (5% CO<sub>2</sub>), inspected daily  
401 and infectious virus harvested at  $\geq 50\%$  syncytia formation. Emory's Cloning Core was  
402 used to make individual mutants in the backbone of NL4.3. These mutant viruses were  
403 made using HEK-293/17 cells that were transfected with 6  $\mu$ g of viral DNA using  
404 Xtreme-GENE HP (Roche, Basel, Switzerland) Transfection reagent. After 48 h  
405 incubation HEK-293/17 cell supernatants were harvested, concentrated overnight with a  
406 Lenti-X concentrator (Clontech) according to the manufacturer's protocol.

407 **Determination of TCID<sub>50</sub> values and p24 content.** TCID<sub>50</sub> values were  
408 determined by infecting  $5 \times 10^4$  MT-2 cells per well, in 96-well flat-bottom plates, with four-  
409 fold serial dilutions of virus stock. Three replicates were performed for each virus. Infected  
410 plates were inspected daily for syncytia formation; every three days, half of the  
411 supernatant was replaced with fresh media. The assay was terminated when no  
412 additional syncytia formation was noted for two days. The TCID<sub>50</sub> was then calculated  
413 using the Reed-Muench method (Reed and Muench, 1938). The p24 content of each  
414 virus stock was determined using the HIV-1 p24<sup>CA</sup> Antigen Capture Assay kit (SAIC-  
415 Frederick, Frederick, MA).

416 **Serial passage for selection of resistant virus.** MT-2 cells were suspended at  
417  $2.5 \times 10^5$  cells per mL in 10 mL of media containing EFdA. Initial EFdA concentrations  
418 were chosen based on the EC<sub>50</sub> of WT stock virus (8.6 nM), with a similar amount chosen  
419 for the K65R virus and slightly higher concentrations for the D67N/K70R/T215F/K219Q  
420 (10 nM) and M184V (12 nM) strains. Passages were initiated by immediately adding 200

421 TCID<sub>50</sub> of the appropriate unpassaged (P<sub>0</sub>) virus stock to the cells and mixing gently.  
422 Untreated cultures were initiated by infecting 2.5 x 10<sup>5</sup> MT-2 cells per mL with 200 TCID<sub>50</sub>  
423 of P<sub>0</sub> virus stock in 10 mL drug-free media. All passages and untreated cultures were  
424 grown in T-25 tissue culture flasks. Every 2 – 3 days, cells were mixed and replaced with  
425 fresh media containing the appropriate concentration of EFdA. Cultures were visually  
426 inspected every 1 – 2 days for the presence of syncytia. At ≥ 75% syncytia formation,  
427 culture supernatants were harvested, concentrated using Amicon Ultra Ultracel – 100K  
428 centrifugal filters (Millipore, Carrigtwohill, Co. Cork, Ireland) and syringe-filtered through  
429 0.22 µm filters (Millipore). The p24 content of the resulting first passage (P<sub>1</sub>) supernatant  
430 was determined as described above. This procedure was followed for all subsequent  
431 passages, with P<sub>N</sub> initiated by infecting 2.5 x 10<sup>6</sup> MT-2 cells with P<sub>N-1</sub> virus supernatant in  
432 media containing the appropriate concentration of EFdA. Untreated cultures were also  
433 initiated by infecting 2.5 x10<sup>6</sup> MT-2 cells, in drug-free media, with P<sub>N-1</sub> virus. As infectivity  
434 differences were expected between the P<sub>0</sub> virus and the output strains from each  
435 passage, P<sub>2</sub> and all subsequent passages were initiated by infecting cells with a p24  
436 amount of P<sub>N-1</sub> virus equivalent to the P<sub>0</sub> virus p24 content used to initiate P<sub>1</sub>. The  
437 concentration of EFdA was doubled every two passages up to P<sub>6</sub>, after which point the  
438 amount of drug was doubled every passage. Passages lasting more than 60 days without  
439 syncytia formation were terminated and repeated, along with the previous passage. If no  
440 syncytia were noted in a repeat passage after 30 days, the passage was terminated and  
441 no further attempts were performed.

442 **Dose response to individual mutants.** All individual mutants were cloned into  
443 NL4.3 using Emory's Cloning Core. After each virus was generated as stated above,

444 TZM-GFP cells were plated at  $1 \times 10^3$  cells/well in a 96-well plate and with serial-diluted  
445 EFdA starting at 1 nM and the cells and EFdA were incubated for 24 h. After, the cells  
446 were infected with virus and 1  $\mu\text{g}/\text{mL}$  final concentration of DEAE Dextran and incubated  
447 for 48. The GFP positive cells were then counted using Cytation 5 (Biotek, Winooski, VT)  
448 with Gen5.5 Software.  $\text{EC}_{50}$  curves were then determined using Prism 5 (GraphPad)  
449 software.

450 **Viral Replication Assays.** JLTRG-R5 cells were plated at  $5 \times 10^6$  cells/well in a  
451 12 well plate. The plasmid NL4.3 and various mutants were transfected into JLTRG-R5  
452 cells with 1  $\mu\text{g}$  of viral DNA using Xtreme-GENE HP (Roche) Transfection reagent. After  
453 48 h incubation, cells were imaged using Cytation 5 to quantify GFP sum signal, cells  
454 were then split and media was replaced. Cells were subsequently imaged and split every  
455 2-3 days until day 20. After day 20, genomic DNA was extracted using DNeasy Blood &  
456 Tissue Kit (Qiagen, Valencia, CA). Genomic DNA was PCR amplified using primers: 5'-  
457 gaagaaatgaatttgccagg-3' and 5'-ctcatgttcttcttgggc-3' and Phusion DNA Polymerase  
458 Master mix (New England Biolabs, Ipswich, MA). DNA was sent for Sanger Sequencing  
459 to check for reversion mutations.

460 **Specific Infectivity.** TZM-GFP cells were plated at 10,000 cells/well in a 96-well  
461 plate and incubated for 24 h. After, cells were infected with the varying concentrations of  
462 the virus and a 1  $\mu\text{g}/\text{mL}$  final concentration of DEAE-dextran and incubated for 48 h. The  
463 GFP positive cells were then counted as described above. The p24 content of each virus  
464 was also determined using an ELISA.

465 **Steady State Kinetics and *in vitro*  $\text{IC}_{50}$ s.** HIV-1 RT and mutants were expressed  
466 and purified as described previously (Bauman et al., 2008; Kirby et al., 2012; Michailidis

467 et al., 2009; Ndongwe et al., 2012; Sarafianos et al., 2003; Schuckmann et al., 2010). RT  
468 was expressed in JM-109 cells (Invitrogen) and purified by nickel affinity chromatography  
469 and Mono Q anion exchange chromatography. Steady state kinetic parameters,  $K_m$ , for  
470 incorporation of EFdA-MP were determined using plate-based assays measuring an 18  
471 nucleotide primer annealed to 100 nucleotide DNA template (Kankanala et al., 2017;  
472 Singh et al., 2012; Tang et al., 2019, 2017; Vernekar et al., 2017; Wang et al., 2018). The  
473 reactions were carried out in RT buffer with 6 mM  $MgCl_2$ , 40 nM Td100/Pd18, and 10 nM  
474 RT in a final volume of 20  $\mu$ l for 30min at 37 °C, and arrested by 100 mM of EDTA. The  
475 QuantiFluor dsDNA System (Promega) was used to quantify the amount of formed  
476 double-stranded DNA. Reactions were read at ex/em 504/531 nm in a PerkinElmer  
477 EnSpire Multilabel plate reader.  $K_m$  were determined graphically using the Michaelis-  
478 Menten equation using Prism Software.

479 **Sequencing of passaged viruses.** Viral RNA was purified from supernatants  
480 using the QIAamp Viral RNA Mini kit (Qiagen, Valencia, CA), the concentration  
481 determined with a Spectronic BioMate\*3 UV spectrophotometer (Thermo Scientific,  
482 Waltham, MA) and 500 ng used as the template for cDNA synthesis. First-strand PCR  
483 was performed using random hexamer primers and the SuperScript III First-Strand  
484 Synthesis System for RT-PCR (Invitrogen, Carlsbad, CA). The resulting cDNA was PCR  
485 amplified using HIV-1 LAI-specific primers ABR-RT-OF (1763 5'-  
486 GGAGCCGATAGACAAGGAACTG-3') and ABR-RT-OR2 (3863 5'-  
487 GGCTACTATTTCTTTTGCTACTACAGG-3'). These primers anneal to the 3' end of gag  
488 and the 5' end of integrase, respectively, and generate a 2127 bp product spanning the  
489 full length of the reverse transcriptase gene. PCR was performed using the Expand High

490 Fidelity PCR System dNTPack (Roche Diagnostics GmbH, Mannheim, Germany), with  
491 4.5 mM MgCl<sub>2</sub> and 3.5 U of enzyme mix used for each reaction. Reactions were run in a  
492 PCR Sprint bench-top PCR cycler (Thermo Electron) with an initial denaturation of 3  
493 minutes at 94 °C, followed by 30 amplification cycles, each consisting of 30 seconds at  
494 94 °C, 45 seconds at 58 °C and 150 seconds at 72 °C. Following a seven-minute final  
495 extension at 72 °C, samples were used immediately or stored at -20 °C.

496 PCR products were separated by electrophoresis on a 1% agarose gel, and the  
497 2127 bp band harvested using the QIAquick Gel Extraction kit (Qiagen, Valencia, CA).  
498 The concentration of DNA was determined by spectrophotometry, and 500 ng of sample  
499 was submitted to ACGT Inc (Wheeling, IL) for full-length, double-stranded population  
500 sequencing. The P<sub>0</sub> consensus sequences from each virus were aligned in Clustal X-2  
501 (Larkin et al., 2007) with an independent HIV-1 LAI nucleotide sequence (Accession  
502 NC\_001802) to ensure the stock viruses did not contain unexpected mutations.  
503 Nucleotide consensus sequences from each passage were aligned to the appropriate P<sub>0</sub>  
504 consensus. Chromatograms were also inspected visually using Chromatogram Explorer  
505 and DNABaser (Heracle BioSoft S.R.L., Pitesti, Romania) for the presence of  
506 heterogeneous peaks and minority sequence populations not detectable in the consensus  
507 sequence.

#### 508 **Clonal sequencing of full-length reverse transcriptase gene PCR products.**

509 Approximately 105 ng of full-length PCR product was ligated into the pGEM-T Vector  
510 System (Promega, Madison, WI), at a 3:1 molar ratio of insert:vector and incubated  
511 overnight at 4 °C. Ligations were transformed into MAX Efficiency DH5α competent cells  
512 (Invitrogen, Carlsbad, CA) by heat shock. Blue-white screening was used to select clones

513 with successful ligations, and plasmids containing the full-length reverse transcriptase  
514 gene were isolated with the QIAprep Spin Miniprep kit (Qiagen, Valencia, CA). A minimum  
515 of 20 clones from each sample were sequenced. Primers ABR-RT-OF and ABR-RT-OR2  
516 were used to sequence the 5' and 3' ends of reverse transcriptase, while an internal  
517 portion of the gene was sequenced with primer ABR-RT-IF (2211 5'-  
518 CAGAGATGGAAAAGGAAGGG-3'). Clones were aligned with the appropriate P<sub>0</sub> stock  
519 virus consensus in Clustal X-2, and the proportion of sequences with the novel  
520 substitutions was determined.

521

## 522 **ACKNOWLEDGMENTS**

523 We acknowledge the key experimental contribution by Aaron B Reeve in the viral passage  
524 experiments and also in the initial stages of writing a different version of the manuscript.  
525 As he is inaccessible to approve this version of the manuscript, he is currently not included  
526 in the author list, in compliance to the Journal's editorial guidelines. The author list will be  
527 updated appropriately when he approves the submitted version. Michael Parniak was  
528 involved in the early research and writing processes; as he is deceased it has not been  
529 possible to obtain his approval of the final version of the manuscript.

530 This work was supported in whole or in part by NIH grants AI076119 to S.G.S.  
531 T32GM008367 (provided training funds for M.E.C.).

532 The following reagents were obtained through the AIDS Research and Reference  
533 Reagent Program, Division of AIDS, NIAID, NIH: MT-2 cells from Dr. Douglas Richman,  
534 P4-R5 MAGI cells from Dr. Nathaniel Landau; HEK-293 cells from Dr. Andrew Rice.



535 This study was supported in part by the Emory Integrated Genomics Core (EIGC), which  
536 is subsidized by the Emory University School of Medicine and is one of the Emory  
537 Integrated Core Facilities. Additional support was provided by the National Center for  
538 Advancing Translational Sciences of the National Institutes of Health under Award  
539 Number UL1TR000454. The content is solely the responsibility of the authors and does  
540 not necessarily reflect the official views of the National Institutes of Health.

541

542 **FIGURES**

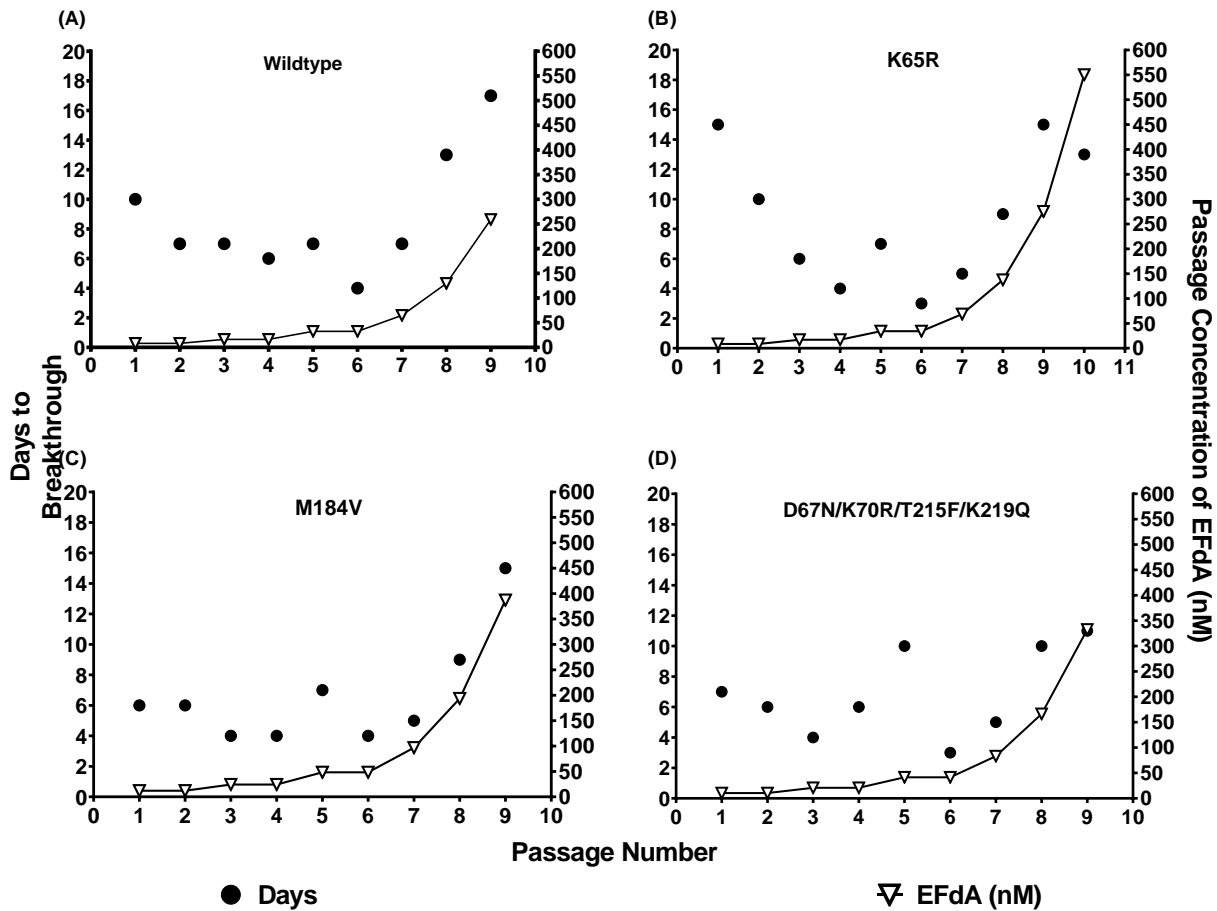

543 **FIG. 1.** Selection of resistance to EFdA by serial passage. MT-2 cells were infected with  
544 200 TCID<sub>50</sub> of HIV-1 in media supplemented with EFdA. Cells were split 1:10 every 2 – 3  
545 days and the supernatant replaced with fresh media supplemented with EFdA. Time to  
546 breakthrough was determined as the number of days required for ≥ 75% syncytia  
547 formation, at which point supernatants were harvested, assayed for p24 content and used  
548 to infect the subsequent passage. EFdA concentration was doubled every second  
549 passage until P<sub>6</sub>, and every passage thereafter. Results represent a single trial for each  
550 passage. Passages were initiated with (A) WT (xxLAI), (B) K65R, (C) M184V, and (D)  
551 D67N/K70R/T215F/K219Q.

553

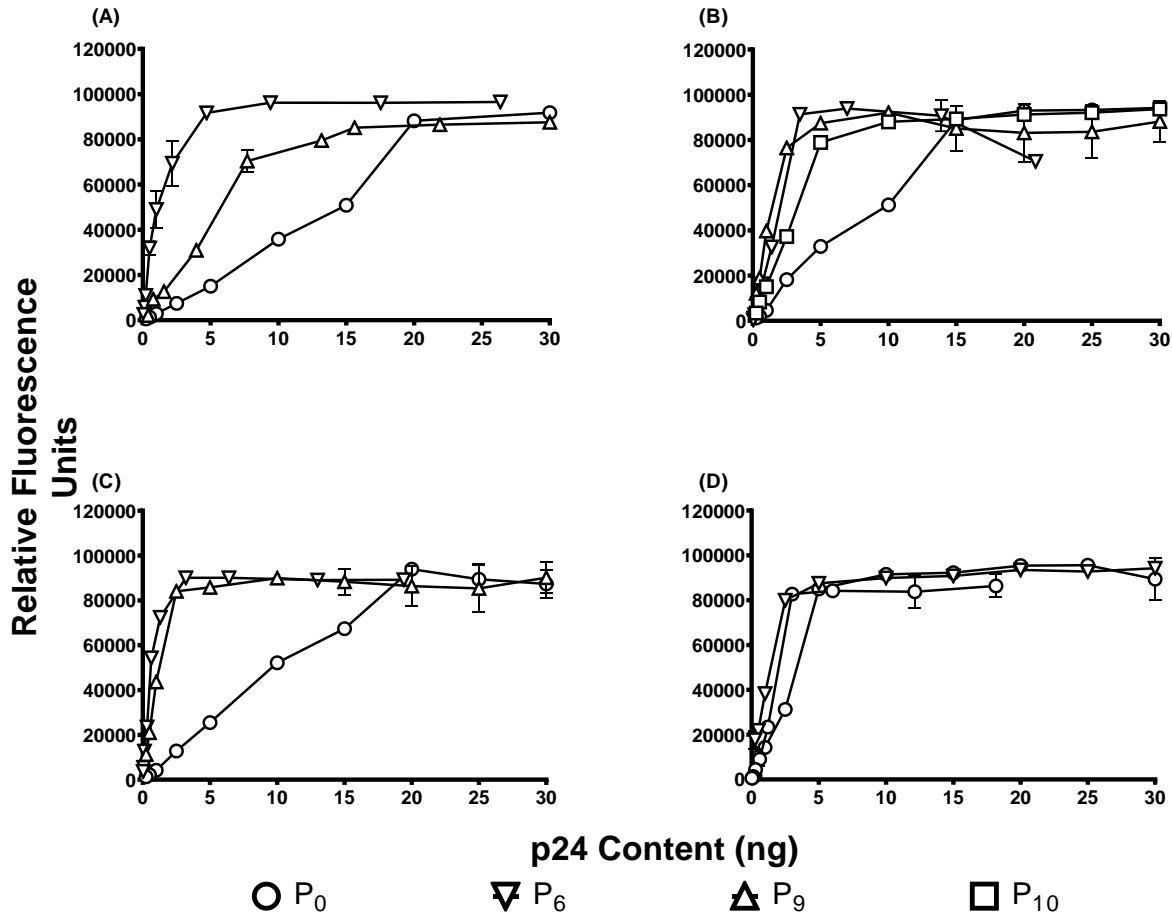

554

555 **FIGURE 2.** Infectivity of viruses selected during serial passage in EFdA. Untreated P4-  
556 R5 MAGI cells were infected with virus supernatants from P<sub>0</sub>, P<sub>6</sub>, P<sub>9</sub> or P<sub>10</sub> (where  
557 applicable). After 48 h, cells were lysed and  $\beta$ -galactosidase activity assessed. Virus  
558 infection is shown as relative fluorescence units. Results are the mean and S.D. of one  
559 experiment with three replicates. (A) WT (xxLAI), (B) K65R, (C) M184V, and (D)  
560 D67N/K70R/T215F/K219Q.

561

562

563

564

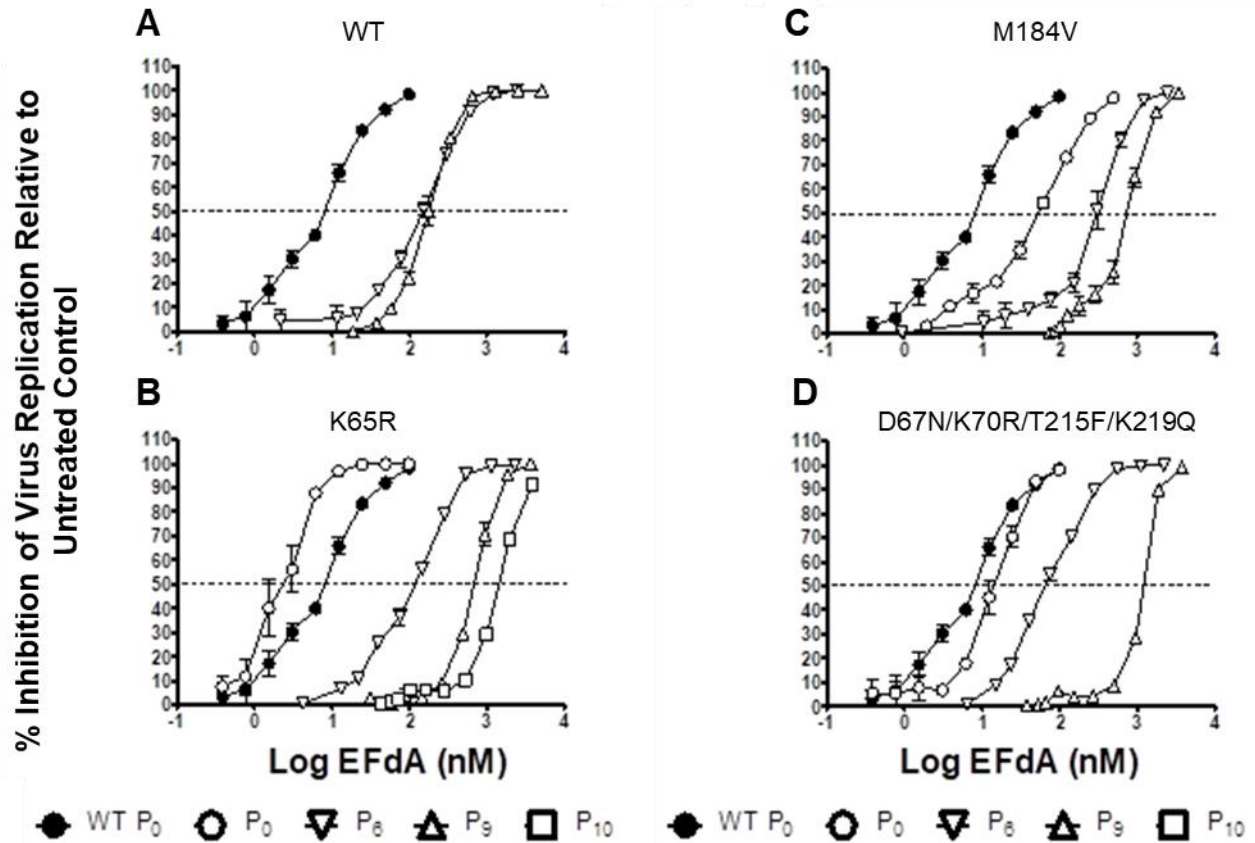

565

566 **FIGURE 3.** EFdA dose response for viruses selected during serial passage in EFdA. P4-  
567 R5 MAGI cells were infected with virus supernatants from P<sub>0</sub>, P<sub>6</sub>, P<sub>9</sub> or P<sub>10</sub> (where  
568 applicable) and treated with EFdA. Following incubation for 48 h, cells were lysed and  $\beta$ -  
569 galactosidase activity assessed. (A, B, C, D) Inhibition of virus replication relative to  
570 infected untreated cells. Dashed line represents 50% inhibition of viral replication.  
571 Results are the mean and S.D. of one experiment with three replicates.

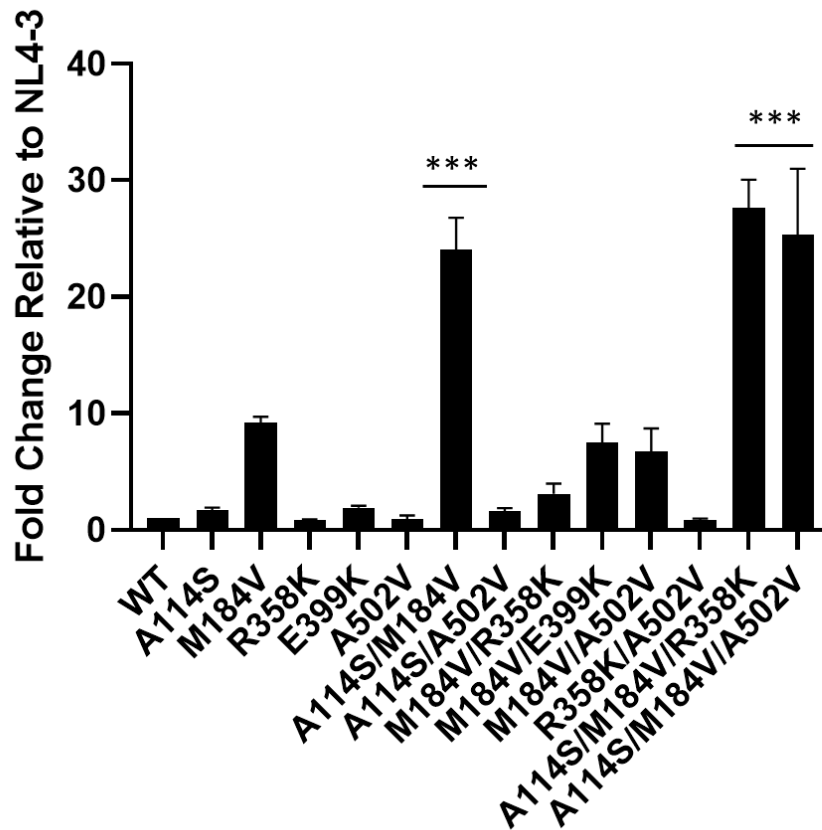

572

573 **FIGURE 4.** Fold-change  $EC_{50}$ s relative to NL4-3. TZM-GFP cells were pre-treated with  
574 EFdA and infected after 24h. GFP positive cells (infected cells) were counted in varying  
575 concentrations of EFdA. Mutants were normalized to WT infection to produce fold change.  
576 EFdA dose response curves were produced for each mutant and the  $EC_{50}$ s calculated.  
577 \*\*\*= $p < .0001$  Statistical significance was determined using a one-way ANOVA with  
578 Tukey's post-test. Results are the mean and S.D. of four experiments with duplicates.

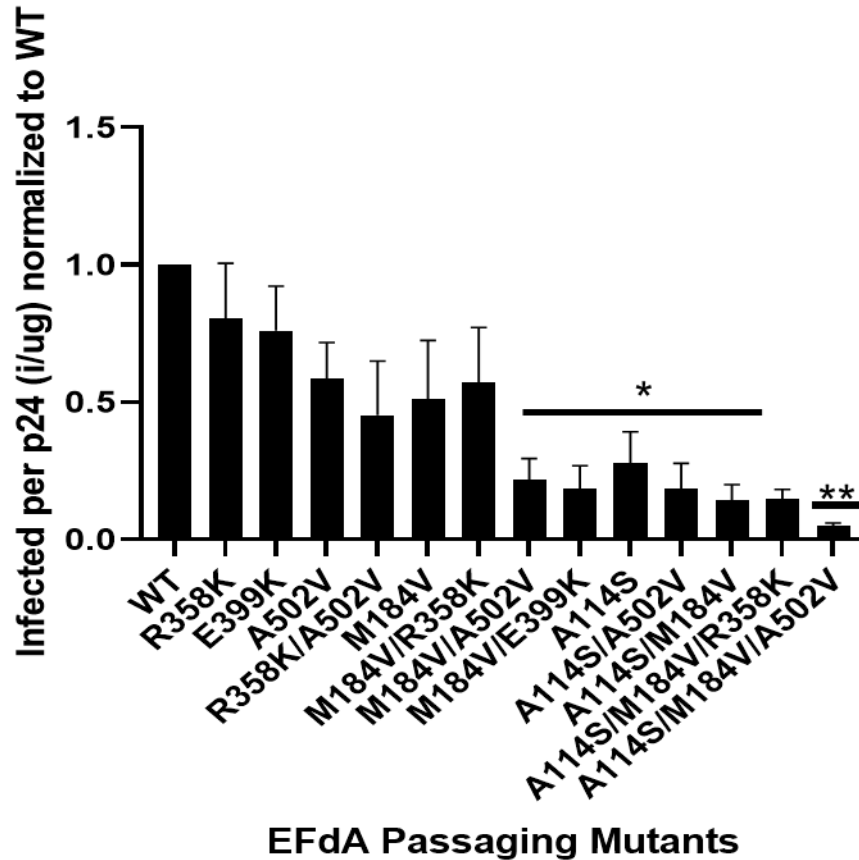

579

580 **FIGURE 5.** Single-round replication assays using TZM-GFP cells infected with individual  
581 mutants. An ELISA was also performed on the virus to determine amount of p24 (total  
582 virus in medium). The ratio of infected cells per p24 was then calculated and normalized  
583 to WT. Statistical significance was determined using a one-way ANOVA with Dunnet's  
584 multiple comparison test (\*= $p < .05$ , \*\*= $p < .01$ ). Results are the mean and S.D. of four  
585 experiments in triplicates.

586

587 Table 1. Amino acid mutations in WT-, K65R-, M184V- and D67N/K70R/T215F/K219Q-derived viruses  
 588 during serial passage in progressively increasing concentrations of EFdA

| Virus                             | Passage                   | Sequencing <sup>a</sup>           |                                       |
|-----------------------------------|---------------------------|-----------------------------------|---------------------------------------|
|                                   |                           | Amino Acid Mutations <sup>b</sup> | Proportion of Sequence Population (%) |
| WT<br>(xxLAI)                     | 0 <sup>c</sup>            | None                              | 100                                   |
|                                   | 6                         | M184I                             | 100                                   |
|                                   | 9                         | M184I                             | 36.4                                  |
|                                   |                           | M184I, E399K                      | 31.8                                  |
|                                   |                           | M184V                             | 18.2                                  |
| None                              |                           | 13.6                              |                                       |
| K65R                              | 0 <sup>c</sup>            | None                              | 100                                   |
|                                   | 6                         | R65K, M184I                       | 90.9                                  |
|                                   |                           | R65K, M184V                       | 9.1                                   |
|                                   | 9                         | R65K, M184V, A502V                | 43.5                                  |
|                                   |                           | R65K, M184I                       | 34.8                                  |
|                                   |                           | R65K, M184V                       | 17.4                                  |
|                                   |                           | R65K, M184I, A502V                | 4.3                                   |
| 10                                | R65K, A114S, M184V, A502V | 90.9                              |                                       |
|                                   | R65K, A114S, M184V        | 4.5                               |                                       |
|                                   | R65K, A114S, A502V        | 4.5                               |                                       |
| M184V                             | 0 <sup>c</sup>            | None                              | 100                                   |
|                                   | 6                         | R358K                             | 45                                    |
|                                   |                           | None                              | 55                                    |
|                                   | 9                         | R358K                             | 90.5                                  |
|                                   |                           | None                              | 9.5                                   |
| 10                                | R358K                     | 72.7                              |                                       |
| R358K/A502V                       | 27.3                      |                                   |                                       |
| D67N/<br>K70R/<br>T215F/<br>K219Q | 0 <sup>c</sup>            | None                              | 100                                   |
|                                   | 6                         | M184V                             | 66.7                                  |
|                                   |                           | None                              | 33.3                                  |
|                                   | 9                         | M184V                             | 18.2                                  |
| M184V, E399K                      |                           | 81.8                              |                                       |

589 <sup>a</sup>Population and clonal sequencing of viral RNA from passage supernatants was performed as described  
 590 in Materials and Methods.

591 <sup>b</sup>Relative to unpassaged stock virus of the appropriate strain

592 <sup>c</sup>Unpassaged stock virus

593 **Table 2. Steady-State Kinetics for Reverse Transcriptase Mutants**

|                           | <b>WT RT</b> | <b>A114S</b> | <b>M184V</b> | <b>R358K</b> | <b>E399K</b> | <b>A502V</b> | <b>184V/358K/502V</b> | <b>114S/184V/502V</b> |
|---------------------------|--------------|--------------|--------------|--------------|--------------|--------------|-----------------------|-----------------------|
| $K_m$ (nM)                | 1448         | 2758         | 1791         | 2008         | 1795         | 1110         | 2327                  | 6659                  |
| Fold Change $K_m$         | 1            | 1.9          | 1.2          | 1.4          | 1.2          | 0.8          | 1.6                   | 4.6                   |
| Fold Change $k_{cat}/K_m$ | 1            | 2.1          | 1.2          | 1.4          | 1.2          | 1            | 1.3                   | 6.5                   |

594



595 **REFERENCES**

- 596 Arion, D., Sluis-Cremer, N., Parniak, M.A., 2000. Mechanism by which phosphonoformic  
597 acid resistance mutations restore 3'-azido-3'-deoxythymidine (AZT) sensitivity to  
598 AZT-resistant HIV-1 reverse transcriptase. *J. Biol. Chem.* 275, 9251–9255.  
599 <https://doi.org/10.1074/jbc.275.13.9251>
- 600 Barrett, S.E., Teller, R.S., Forster, S.P., Li, L., Mackey, M.A., Skomski, D., Yang, Z.,  
601 Fillgrove, K.L., Doto, G.J., Wood, S.L., Lebron, J., Grobler, J.A., Sanchez, R.I., Liu,  
602 Z., Lu, B., Niu, T., Sun, L., Gindy, M.E., 2018. Extended-duration MK-8591-eluting  
603 implant as a candidate for HIV treatment and prevention. *Antimicrob. Agents*  
604 *Chemother.* <https://doi.org/10.1128/AAC.01058-18>
- 605 Bauman, J.D., Das, K., Ho, W.C., Baweja, M., Himmel, D.M., Clark, A.D., Oren, D.A.,  
606 Boyer, P.L., Hughes, S.H., Shatkin, A.J., Arnold, E., 2008. Crystal engineering of  
607 HIV-1 reverse transcriptase for structure-based drug design. *Nucleic Acids Res.*  
608 <https://doi.org/10.1093/nar/gkn464>
- 609 Bazmi, H.Z., Hammond, J.L., Cavalcanti, S.C., Chu, C.K., Schinazi, R.F., Mellors, J.W.,  
610 2000. In vitro selection of mutations in the human immunodeficiency virus type 1  
611 reverse transcriptase that decrease susceptibility to (-)-beta-D-dioxolane-guanosine  
612 and suppress resistance to 3'-azido-3'-deoxythymidine. *Antimicrob. Agents*  
613 *Chemother.* 44, 1783–8.
- 614 Boucher, C.A., Cammack, N., Schipper, P., Schuurman, R., Rouse, P., Wainberg, M.A.,  
615 Cameron, J.M., 1993. High-level resistance to (-) enantiomeric 2'-deoxy-3'-  
616 thiacytidine in vitro is due to one amino acid substitution in the catalytic site of  
617 human immunodeficiency virus type 1 reverse transcriptase. *Antimicrob. Agents*  
618 *Chemother.* 37, 2231–2234. <https://doi.org/10.1128/AAC.37.10.2231>
- 619 Boufford, D.E., Spongberg, S.A., 1983. Eastern Asian-Eastern North American  
620 Phytogeographical Relationships-A History From the Time of Linnaeus to the  
621 Twentieth Century. *Ann. Missouri Bot. Gard.* 70, 423–439.  
622 <https://doi.org/10.2307/2992081>
- 623 Boyer, P.L., Sarafianos, S.G., Arnold, E., Hughes, S.H., 2002. The M184V Mutation  
624 Reduces the Selective Excision of Zidovudine 5'-Monophosphate (AZTMP) by the  
625 Reverse Transcriptase of Human Immunodeficiency Virus Type 1. *J. Virol.* 76,  
626 3248–3256. <https://doi.org/10.1128/JVI.76.7.3248-3256.2002>
- 627 Brehm, J.H., Koontz, D., Meter, J.D., Pathak, V., Sluis-Cremer, N., Mellors, J.W.,  
628 2007. Selection of Mutations in the Connection and RNase H Domains of Human  
629 Immunodeficiency Virus Type 1 Reverse Transcriptase That Increase Resistance  
630 to 3'-Azido-3'-Dideoxythymidine. *J. Virol.* 81, 7852–7859.  
631 <https://doi.org/10.1128/JVI.02203-06>
- 632 Brenner, B.G., Coutinos, D., 2009. The K65R mutation in HIV-1 reverse transcriptase:  
633 Genetic barriers, resistance profile and clinical implications. *HIV Ther.* 3, 583–594.  
634 <https://doi.org/10.2217/hiv.09.40>
- 635 Brinkman, K., Kakuda, T.N., 2000. Mitochondrial Toxicity of Nucleoside Analogue  
636 Reverse Transcriptase Inhibitors: A Looming Obstacle for Long-term Antiretroviral

- 637 Therapy? *Curr. Opin. Infect. Dis.* 13, 5–11.  
638 <https://doi.org/10.1887/0750303468/b293c2>
- 639 Brinkman, K., Smeitink, J.A., Romijn, J.A., Reiss, P., 1999. Mitochondrial toxicity  
640 induced by nucleoside-analogue reverse-transcriptase inhibitors is a key factor in  
641 the pathogenesis of antiretroviral-therapy-related lipodystrophy. *Lancet* 354, 1112–  
642 1115. [https://doi.org/10.1016/S0140-6736\(99\)06102-4](https://doi.org/10.1016/S0140-6736(99)06102-4)
- 643 Brinkman, K., ter Hofstede, H.J.M., Burger, D.M., Smeitink, J.A.M., Koopmans, P.P.,  
644 1998. Adverse effects of reverse transcriptase inhibitors. *Aids* 12, 1735–1744.  
645 <https://doi.org/10.1097/00002030-199814000-00004>
- 646 Cases-Gonzalez, C.E., Menéndez-Arias, L., 2005. Nucleotide specificity of HIV-1  
647 reverse transcriptases with amino acid substitutions affecting Ala-114. *Biochem. J.*  
648 387, 221–229. <https://doi.org/10.1042/BJ20041056>
- 649 Charneau, P., Mirambeau, G., Roux, P., Paulous, S., Buc, H., Clavel, F., 1994. HIV-1  
650 reverse transcription. A termination step at the center of the genome. *J. Mol. Biol.*  
651 241, 651–662. <https://doi.org/10.1006/jmbi.1994.1542>
- 652 Chiang, C.C., Tseng, Y.T., Huang, K.J., Pan, Y.Y., Wang, C.T., 2012. Mutations in the  
653 HIV-1 reverse transcriptase tryptophan repeat motif affect virion maturation and  
654 Gag-Pol packaging. *Virology* 422, 278–287.  
655 <https://doi.org/10.1016/j.virol.2011.11.001>
- 656 Cihlar, T., Fordyce, M., 2016. Current status and prospects of HIV treatment. *Curr.*  
657 *Opin. Virol.* 18, 50–56. <https://doi.org/10.1016/j.coviro.2016.03.004>
- 658 Clutter, D.S., Jordan, M.R., Bertagnolio, S., Shafer, R.W., 2016. HIV-1 drug resistance  
659 and resistance testing. *Infect. Genet. Evol.*  
660 <https://doi.org/10.1016/j.meegid.2016.08.031>
- 661 Delviks-Frankenberry, K.A., Nikolenko, G.N., Boyer, P.L., Hughes, S.H., Coffin, J.M.,  
662 Jere, A., Pathak, V.K., 2008. HIV-1 reverse transcriptase connection subdomain  
663 mutations reduce template RNA degradation and enhance AZT excision. *Proc.*  
664 *Natl. Acad. Sci.* 105, 10943–10948. <https://doi.org/10.1073/pnas.0804660105>
- 665 Derdeyn, C.A., Decker, J.M., Sfakianos, J.N., Wu, X., O'Brien, W.A., Ratner, L.,  
666 Kappes, J.C., Shaw, G.M., Hunter, E., 2000. Sensitivity of Human  
667 Immunodeficiency Virus Type 1 to the Fusion Inhibitor T-20 Is Modulated by  
668 Coreceptor Specificity Defined by the V3 Loop of gp120. *J. Virol.*  
669 <https://doi.org/10.1128/jvi.74.18.8358-8367.2000>
- 670 Ding, J., Das, K., Hsiou, Y., Sarafianos, S.G., Clark, A.D., Jacobo-Molina, A., Tantillo,  
671 C., Hughes, S.H., Arnold, E., 1998. Structure and functional implications of the  
672 polymerase active site region in a complex of HIV-1 RT with a double-stranded  
673 DNA template-primer and an antibody Fab fragment at 2.8 Å resolution. *J. Mol.*  
674 *Biol.* 284, 1095–1111. <https://doi.org/10.1006/jmbi.1998.2208>
- 675 Eggleton, J.S., Nagalli, S., 2020. Highly Active Antiretroviral Therapy (HAART).  
676 StatPearls [Internet], Treasure Island (FL).

- 677 Frost, S.D.W., Nijhuis, M., Schuurman, R., Boucher, C.A.B., Brown, A.J.L., 2000.  
678 Evolution of Lamivudine Resistance in Human Immunodeficiency Virus Type 1-  
679 Infected Individuals: the Relative Roles of Drift and Selection. *J. Virol.* 74, 6262–  
680 6268. <https://doi.org/10.1128/JVI.74.14.6262-6268.2000>
- 681 Gallois-Montbrun, S., Schneider, B., Chen, Y., Giacomoni-Fernandes, V., Mulard, L.,  
682 Morera, S., Janin, J., Deville-Bonne, D., Veron, M., 2002. Improving nucleoside  
683 diphosphate kinase for antiviral nucleotide analogs activation. *J. Biol. Chem.* 277,  
684 39953–39959. <https://doi.org/10.1074/jbc.M206360200>
- 685 Graham, F.L., Smiley, J., Russell, W.C., Nairn, R., 1977. Characteristics of a human cell  
686 line transformed by DNA from human adenovirus type 5. *J. Gen. Virol.* 36, 59–72.  
687 <https://doi.org/10.1099/0022-1317-36-1-59>
- 688 Grobler, J.A., Fillgrove, K., Hazuda, D., Huang, Q., Lai, M.T., Matthews, R.P., Rudd,  
689 D.J., Vargo, R., 2019. MK-8591 potency and PK provide high inhibitory quotients at  
690 low doses QD and QW, in: Conference on Retroviruses and Opportunistic  
691 Infections (CROI).
- 692 Haertle, T., Carrera, C.J., Wasson, D.B., Sowers, L.C., Richman, D.D., Carson, D.A.,  
693 1988. Metabolism and anti-human immunodeficiency virus-1 activity of 2-halo-2',3'-  
694 dideoxyadenosine derivatives. *J. Biol. Chem.* 263, 5870–5875.
- 695 Harris, D., Kaushik, N., Pandey, P.K., Yadav, P.N.S., Pandey, V.N., 1998. Functional  
696 Analysis of Amino Acid Residues Constituting the dNTP Binding Pocket of HIV-1  
697 Reverse Transcriptase. *J. Biol. Chem.* 273, 33624–33634.  
698 <https://doi.org/10.1074/jbc.273.50.33624>
- 699 Hattori, S., Ide, K., Nakata, H., Harada, H., Suzu, S., Ashida, N., Kohgo, S., Hayakawa,  
700 H., Mitsuya, H., Okada, S., 2009. Potent Activity of a Nucleoside Reverse  
701 Transcriptase Inhibitor, 4'-Ethynyl-2-Fluoro-2'-Deoxyadenosine, against Human  
702 Immunodeficiency Virus Type 1 Infection in a Model Using Human Peripheral Blood  
703 Mononuclear Cell-Transplanted NOD/SCID Janus Kinase 3 Kno. *Antimicrob.*  
704 *Agents Chemother.* 53, 3887–3893. <https://doi.org/10.1128/AAC.00270-09>
- 705 Huang, H., Chopra, R., Verdine, G.L., Harrison, S.C., 1998. Structure of a covalently  
706 trapped catalytic complex of HIV-1 reverse transcriptase: Implications for drug  
707 resistance. *Science (80-. )*. 282, 1669–1675.  
708 <https://doi.org/10.1126/science.282.5394.1669>
- 709 J., G., C., M., C., F., D., D., L., S., M., V., S., B., K., F., D., H., 2017. MK-8591  
710 concentrations at sites of HIV transmission and replication. *Top. Antivir. Med.*
- 711 J., G., E., F., S.E., B., S.L., W., W., A., K.L., F., M.-T., L., M., G., M., I., 2016. Long-  
712 acting oral and parenteral dosing of MK-8591 for HIV treatment or prophylaxis. *Top.*  
713 *Antivir. Med.*
- 714 Julias, J.G., McWilliams, M.J., Sarafianos, S.G., Alvord, W.G., Arnold, E., Hughes, S.H.,  
715 2003. Mutation of amino acids in the connection domain of human  
716 immunodeficiency virus type 1 reverse transcriptase that contact the template-  
717 primer affects RNase H activity. *J. Virol.* 77, 8548–8554.

- 718 <https://doi.org/10.1128/JVI.77.15.8548>
- 719 Kageyama, M., Nagasawa, T., Yoshida, M., Ohru, H., Kuwahara, S., 2011.  
720 Enantioselective total synthesis of the potent Anti-HIV nucleoside EFdA. *Org. Lett.*  
721 13, 5264–5266. <https://doi.org/10.1021/ol202116k>
- 722 Kankanala, J., Kirby, K.A., Huber, A.D., Casey, M.C., Wilson, D.J., Sarafianos, S.G.,  
723 Wang, Z., 2017. Design, synthesis and biological evaluations of N-Hydroxy  
724 thienopyrimidine-2,4-diones as inhibitors of HIV reverse transcriptase-associated  
725 RNase H. *Eur. J. Med. Chem.* <https://doi.org/10.1016/j.ejmech.2017.09.054>
- 726 Kawamoto, A., Kodama, E., Sarafianos, S.G., Sakagami, Y., Kohgo, S., Kitano, K.,  
727 Ashida, N., Iwai, Y., Hayakawa, H., Nakata, H., Mitsuya, H., Arnold, E., Matsuoka,  
728 M., 2008a. 2'-Deoxy-4'-C-ethynyl-2-halo-adenosines active against drug-resistant  
729 human immunodeficiency virus type 1 variants. *Int. J. Biochem. Cell Biol.* 40, 2410–  
730 2420. <https://doi.org/10.1016/j.biocel.2008.04.007>
- 731 Kawamoto, A., Kodama, E., Sarafianos, S.G., Sakagami, Y., Kohgo, S., Kitano, K.,  
732 Ashida, N., Iwai, Y., Hayakawa, H., Nakata, H., Mitsuya, H., Arnold, E., Matsuoka,  
733 M., 2008b. 2'-Deoxy-4'-C-ethynyl-2-halo-adenosines active against drug-resistant  
734 human immunodeficiency virus type 1 variants. *Int. J. Biochem. Cell Biol.*  
735 <https://doi.org/10.1016/j.biocel.2008.04.007>
- 736 Kellam, P., Boucher, C.A., Larder, B.A., 1992. Fifth mutation in human  
737 immunodeficiency virus type 1 reverse transcriptase contributes to the development  
738 of high-level resistance to zidovudine. *Proc. Natl. Acad. Sci.* 89, 1934–1938.  
739 <https://doi.org/10.1073/pnas.89.5.1934>
- 740 Keulen, W., Back, N.K., van Wijk, a, Boucher, C. a, Berkhout, B., 1997. Initial  
741 appearance of the 184Ile variant in lamivudine-treated patients is caused by the  
742 mutational bias of human immunodeficiency virus type 1 reverse transcriptase. *J.*  
743 *Virol.* 71, 3346–50.
- 744 Kirby, K.A., Marchand, B., Ong, Y.T., Ndongwe, T.P., Hachiya, A., Michailidis, E.,  
745 Leslie, M.D., Sietsema, D. V., Fetterly, T.L., Dorst, C.A., Singh, K., Wang, Z.,  
746 Parniak, M.A., Sarafianos, S.G., 2012. Structural and inhibition studies of the  
747 RNase H function of xenotropic murine leukemia virus-related virus reverse  
748 transcriptase. *Antimicrob. Agents Chemother.* [https://doi.org/10.1128/AAC.06000-](https://doi.org/10.1128/AAC.06000-11)  
749 11
- 750 Kirby, K.A., Michailidis, E., Fetterly, T.L., Steinbach, M.A., Singh, K., Marchand, B.,  
751 Leslie, M.D., Hagedorn, A.N., Kodama, E.N., Marquez, V.E., Hughes, S.H.,  
752 Mitsuya, H., Parniak, M.A., Sarafianos, S.G., 2013. Effects of substitutions at the 4'  
753 and 2 positions on the bioactivity of 4'-ethynyl-2-fluoro-2'-deoxyadenosine.  
754 *Antimicrob. Agents Chemother.* 57, 6254–6264.  
755 <https://doi.org/10.1128/AAC.01703-13>
- 756 Kirby, K.A., Singh, K., Michailidis, E., Marchand, B., Kodama, E.N., Ashida, N., Mitsuya,  
757 H., Parniak, M.A., Sarafianos, S.G., 2011. The sugar ring conformation of 4'-  
758 ethynyl-2-fluoro-2'-deoxyadenosine and its recognition by the polymerase active  
759 site of HIV reverse transcriptase. *Cell. Mol. Biol.* <https://doi.org/10.1170/T900>

- 760 Kodama, E.I., Kohgo, S., Kitano, K., Machida, H., Gatanaga, H., Shigeta, S., Matsuoka,  
761 M., Ohrui, H., Mitsuya, H., 2001. 4'-Ethylnyl nucleoside analogs: Potent inhibitors of  
762 multidrug-resistant human immunodeficiency virus variants in vitro. *Antimicrob.*  
763 *Agents Chemother.* 45, 1539–1546. [https://doi.org/10.1128/AAC.45.5.1539-](https://doi.org/10.1128/AAC.45.5.1539-1546.2001)  
764 1546.2001
- 765 Kutsch, O., Levy, D.N., Bates, P.J., Decker, J., Kosloff, B.R., Shaw, G.M., Priebe, W.,  
766 Benveniste, E.N., 2004. Bis-Anthracycline Antibiotics Inhibit Human  
767 Immunodeficiency Virus Type 1 Transcription. *Antimicrob. Agents Chemother.*  
768 <https://doi.org/10.1128/AAC.48.5.1652-1663.2004>
- 769 Larder, B.A., Kemp, S.D., 1989. Multiple mutations in HIV-1 reverse transcriptase confer  
770 high-level resistance to zidovudine (AZT). *Science (80- )*. 246, 1155–1158.  
771 <https://doi.org/10.1126/science.2479983>
- 772 Larder, B.A., Kemp, S.D., Harrigan, P.R., 1995. Potential mechanism for sustained  
773 antiretroviral efficacy of AZT-3TC combination therapy. *Science (80- )*. 269, 696–  
774 699. <https://doi.org/10.1126/science.7542804>
- 775 Larder, B.A., Kemp, S.D., Purifoy, D.J., 2006. Infectious potential of human  
776 immunodeficiency virus type 1 reverse transcriptase mutants with altered inhibitor  
777 sensitivity. *Proc. Natl. Acad. Sci.* 86, 4803–4807.  
778 <https://doi.org/10.1073/pnas.86.13.4803>
- 779 Larder, B.A., Purifoy, D.J.M., Powell, K.L., Darby, G., 1987. Site-specific mutagenesis of  
780 AIDS virus reverse transcriptase. *Nature* 327, 716–717.  
781 <https://doi.org/10.1038/327716a0>
- 782 Larkin, M.A., Blackshields, G., Brown, N.P., Chenna, R., McGettigan, P.A., McWilliams,  
783 H., Valentin, F., Wallace, I.M., Wilm, A., Lopez, R., Thompson, J.D., Gibson, T.J.,  
784 Higgins, D.G., 2007. Clustal W and ClustalX version 2. *Bioinformatics* 23, 2947–  
785 2948.
- 786 Lengruber, R.B., Delviks-Frankenberry, K.A., Nikolenko, G.N., Baumann, J., Santos,  
787 A.F., Pathak, V.K., Soares, M.A., 2011. Phenotypic characterization of drug  
788 resistance-associated mutations in HIV-1 RT connection and RNase H domains  
789 and their correlation with thymidine analogue mutations. *J. Antimicrob. Chemother.*  
790 66, 702–708. <https://doi.org/10.1093/jac/dkr005>
- 791 Lewis, W., Day, B.J., Copeland, W.C., 2003. Mitochondrial toxicity of NRTI antiviral  
792 drugs: An integrated cellular perspective. *Nat. Rev. Drug Discov.* 2, 812–822.  
793 <https://doi.org/10.1038/nrd1201>
- 794 Little, S.J., Holte, S., Routy, J.-P., Daar, E.S., Markowitz, M., Collier, A.C., Koup, R.A.,  
795 Mellors, J.W., Connick, E., Conway, B., Kilby, M., Wang, L., Whitcomb, J.M.,  
796 Hellmann, N.S., Richman, D.D., 2002. Antiretroviral-Drug Resistance among  
797 Patients Recently Infected with HIV. *N. Engl. J. Med.* 347, 385–394.  
798 <https://doi.org/10.1056/NEJMoa013552>
- 799 Maeda, K., Desai, D. V., Aoki, M., Nakata, H., Kodama, E.N., Mitsuya, H., 2014.  
800 Delayed emergence of HIV-1 variants resistant to 4'-ethynyl-2-fluoro-2'-



- 801 deoxyadenosine: Comparative sequential passage study with lamivudine, tenofovir,  
802 emtricitabine and BMS-986001. *Antivir. Ther.* 19, 179–189.  
803 <https://doi.org/10.3851/IMP2697>
- 804 Mahy, M., Marsh, K., Sabin, K., Wanyeki, I., Daher, J., Ghys, P.D., 2019. HIV estimates  
805 through 2018: Data for decision-making. *AIDS*.  
806 <https://doi.org/10.1097/QAD.0000000000002321>
- 807 Margolis, D.A., Boffito, M., 2015. Long-acting antiviral agents for HIV treatment. *Curr.*  
808 *Opin. HIV AIDS* 10, 246–252. <https://doi.org/10.1097/COH.0000000000000169>
- 809 Margot, N.A., Isaacson, E., McGowan, I., Cheng, A.K., Schooley, R.T., Miller, M.D.,  
810 2002. Genotypic and phenotypic analyses of HIV-1 in antiretroviral-experienced  
811 patients treated with tenofovir DF. *Aids* 16, 1227–1235.  
812 <https://doi.org/10.1097/00002030-200206140-00004>
- 813 Markowitz, M., Gettie, A., St Bernard, L., Andrews, C.D., Mohri, H., Horowitz, A.,  
814 Grasperge, B.F., Blanchard, J.L., Niu, T., Sun, L., Fillgrove, K., Hazuda, D.J.,  
815 Grobler, J.A., 2020. Once-Weekly Oral Dosing of MK-8591 Protects Male Rhesus  
816 Macaques from Intrarectal Challenge with SHIV109CP3. *J. Infect. Dis.*  
817 <https://doi.org/10.1093/infdis/jiz271>
- 818 Markowitz, M., Sarafianos, S.G., 2018. 4'-Ethyne-2'-fluoro-2'-deoxyadenosine, MK-  
819 8591: A novel HIV-1 reverse transcriptase translocation inhibitor. *Curr. Opin. HIV*  
820 *AIDS*. <https://doi.org/10.1097/COH.0000000000000467>
- 821 Menéndez-Arias, L., 2008. Mechanisms of resistance to nucleoside analogue inhibitors  
822 of HIV-1 reverse transcriptase. *Virus Res.* 134, 124–146.  
823 <https://doi.org/10.1016/j.virusres.2007.12.015>
- 824 Merluzzi, V.J., Hargrave, K.D., Labadia, M., Grozinger, K., Skoog, M., Wu, J.C., Cheng-  
825 Kon, S., Eckner, K., Hattox, S., Adams, J., Rosethal, A.S., Faanes, R., Eckner,  
826 R.J., Koup, R.A., Sullivan, J.L., Sarafianos, S.G., Marchand, B., Das, K., Himmel,  
827 D., Michael, A., Hughes, S.H., Arnold, E., 2010. Structure and Function of HIV-1  
828 Reverse Transcriptase: Molecular Mechanisms of Polymerization and Inhibition.  
829 *Science* (80-. ). 250, 1411–1413.  
830 <https://doi.org/10.1016/j.jmb.2008.10.071>.Structure
- 831 Michailidis, E., Huber, A.D., Ryan, E.M., Ong, Y.T., Leslie, M.D., Matzek, K.B., Singh,  
832 K., Marchand, B., Hagedorn, A.N., Kirby, K.A., Rohan, L.C., Kodama, E.N.,  
833 Mitsuya, H., Parniak, M.A., Sarafianos, S.G., 2014a. 4'-Ethyne-2'-fluoro-2'-  
834 deoxyadenosine (EFdA) inhibits HIV-1 reverse transcriptase with multiple  
835 mechanisms. *J. Biol. Chem.* <https://doi.org/10.1074/jbc.M114.562694>
- 836 Michailidis, E., Huber, A.D., Ryan, E.M., Ong, Y.T., Leslie, M.D., Matzek, K.B., Singh,  
837 K., Marchand, B., Hagedorn, A.N., Kirby, K.A., Rohan, L.C., Kodama, E.N.,  
838 Mitsuya, H., Parniak, M.A., Sarafianos, S.G., 2014b. 4'-Ethyne-2'-fluoro-2'-  
839 deoxyadenosine (EFdA) inhibits HIV-1 reverse transcriptase with multiple  
840 mechanisms. *J. Biol. Chem.* 289, 24533–24548.  
841 <https://doi.org/10.1074/jbc.M114.562694>

- 842 Michailidis, E., Marchand, B., Kodama, E.N., Singh, K., Matsuoka, M., Kirby, K.A.,  
843 Ryan, E.M., Sawani, A.M., Nagy, E., Ashida, N., Mitsuya, H., Parniak, M.A.,  
844 Sarafianos, S.G., 2009. Mechanism of inhibition of HIV-1 reverse transcriptase by  
845 4'-ethynyl-2-fluoro-2'-deoxyadenosine triphosphate, a translocation-defective  
846 reverse transcriptase inhibitor. *J. Biol. Chem.* 284, 35681–35691.  
847 <https://doi.org/10.1074/jbc.M109.036616>
- 848 Michailidis, E., Ryan, E.M., Hachiya, A., Kirby, K.A., Marchand, B., Leslie, M.D., Huber,  
849 A.D., Ong, Y.T., Jackson, J.C., Singh, K., Kodama, E.N., Mitsuya, H., Parniak,  
850 M.A., Sarafianos, S.G., 2013. Hypersusceptibility mechanism of Tenofovir-resistant  
851 HIV to EFdA. *Retrovirology* 10, 65. <https://doi.org/10.1186/1742-4690-10-65>
- 852 Miller, M.D., 2004. K65R, TAMs and tenofovir. *AIDS Rev.* 6, 22–33.
- 853 Muftuoglu, Y., Sohl, C.D., Mislak, A.C., Mitsuya, H., Sarafianos, S.G., Anderson, K.S.,  
854 2014. Probing the molecular mechanism of action of the HIV-1 reverse  
855 transcriptase inhibitor 4'-ethynyl-2-fluoro-2'-deoxyadenosine (EFdA) using pre-  
856 steady-state kinetics. *Antiviral Res.* 106, 1–4.  
857 <https://doi.org/10.1016/j.antiviral.2014.03.001>
- 858 Murphey-Corb, M., Rajakumar, P., Michael, H., Nyaundi, J., Didier, P.J., Reeve, A.B.,  
859 Mitsuya, H., Sarafianos, S.G., Parniak, M.A., 2012. Response of Simian  
860 Immunodeficiency Virus to the Novel Nucleoside Reverse Transcriptase Inhibitor 4'-  
861 Ethynyl-2-Fluoro-2'-Deoxyadenosine In Vitro and In Vivo . *Antimicrob. Agents*  
862 *Chemother.* 56, 4707–4712. <https://doi.org/10.1128/aac.00723-12>
- 863 Naeger, L.K., Struble, K.A., 2006. Effect of baseline protease genotype and phenotype  
864 on HIV response to atazanavir/ritonavir in treatment-experienced patients. *Aids* 20,  
865 847–853. <https://doi.org/10.1097/01.aids.0000218548.77457.76>
- 866 Nakata, H., Amano, M., Koh, Y., Kodama, E., Yang, G., Bailey, C.M., Kohgo, S.,  
867 Hayakawa, H., Matsuoka, M., Anderson, K.S., Cheng, Y.-C.Y.-C., Mitsuya, H.,  
868 2007. Activity against Human Immunodeficiency Virus Type 1, Intracellular  
869 Metabolism, and Effects on Human DNA Polymerases of 4'-Ethynyl-2-Fluoro-2'-  
870 Deoxyadenosine. *Antimicrob. Agents Chemother.* 51, 2701–2708.  
871 <https://doi.org/10.1128/AAC.00277-07>
- 872 Ndongwe, T.P., Adedeji, A.O., Michailidis, E., Ong, Y.T., Hachiya, A., Marchand, B.,  
873 Ryan, E.M., Rai, D.K., Kirby, K.A., Whatley, A.S., Burke, D.H., Johnson, M., Ding,  
874 S., Zheng, Y.M., Liu, S.L., Kodama, E.I., Delviks-Frankenberry, K.A., Pathak, V.K.,  
875 Mitsuya, H., Parniak, M.A., Singh, K., Sarafianos, S.G., 2012. Biochemical,  
876 inhibition and inhibitor resistance studies of xenotropic murine leukemia virus-  
877 related virus reverse transcriptase. *Nucleic Acids Res.*  
878 <https://doi.org/10.1093/nar/gkr694>
- 879 Nitanda, T., Wang, X., Kumamoto, H., Haraguchi, K., Tanaka, H., Cheng, Y.C., Baba,  
880 M., 2005. Anti-human immunodeficiency virus type 1 activity and resistance profile  
881 of 2',3'-didehydro-3'-deoxy-4'-ethynylthymidine in vitro. *Antimicrob. Agents*  
882 *Chemother.* 49, 3355–3360. <https://doi.org/10.1128/AAC.49.8.3355-3360.2005>
- 883 Ochsenbauer-Jambor, C., Jones, J., Heil, M., Zammit, K.P., Kutsch, O., 2006. T-cell line

- 884 for HIV drug screening using EGFP as a quantitative marker of HIV-1 replication.  
885 Biotechniques. <https://doi.org/10.2144/000112072>
- 886 Oliveira, M., Brenner, B.G., Xu, H., Ibanescu, R.I., Mesplède, T., Wainberg, M.A., 2017.  
887 M184I/V substitutions and E138K/M184I/V double substitutions in HIV reverse  
888 transcriptase do not significantly affect the antiviral activity of EFdA. *J. Antimicrob.*  
889 *Chemother.* <https://doi.org/10.1093/jac/dkx280>
- 890 Pear, W.S., Nolan, G.P., Scott, M.L., Baltimore, D., 1993. Production of high-titer  
891 helper-free retroviruses by transient transfection. *Proc. Natl. Acad. Sci. U. S. A.*  
892 <https://doi.org/10.1073/pnas.90.18.8392>
- 893 Pennings, P.S., 2013. HIV drug resistance: Problems and perspectives. *Infect. Dis.*  
894 *Rep.* <https://doi.org/10.4081/idr.2013.s1.e5>
- 895 Petrella, M., Oliveira, M., Moisi, D., Detorio, M., Brenner, B.G., Wainberg, M.A., 2004.  
896 Differential maintenance of the M184V substitution in the reverse transcriptase of  
897 human immunodeficiency virus type 1 by various nucleoside antiretroviral agents in  
898 tissue culture. *Antimicrob. Agents Chemother.* 48, 4189–4194.  
899 <https://doi.org/10.1128/AAC.48.11.4189-4194.2004>
- 900 Platt, E.J., Bilska, M., Kozak, S.L., Kabat, D., Montefiori, D.C., 2009. Evidence that  
901 Ecotropic Murine Leukemia Virus Contamination in TZM-bl Cells Does Not Affect  
902 the Outcome of Neutralizing Antibody Assays with Human Immunodeficiency Virus  
903 Type 1. *J. Virol.* <https://doi.org/10.1128/jvi.00709-09>
- 904 Platt, E.J., Wehrly, K., Kuhmann, S.E., Chesebro, B., Kabat, D., 1998. Effects of CCR5  
905 and CD4 Cell Surface Concentrations on Infections by Macrophagetropic Isolates  
906 of Human Immunodeficiency Virus Type 1. *J. Virol.*  
907 <https://doi.org/10.1128/jvi.72.4.2855-2864.1998>
- 908 Reed, L.J., Muench, H., 1938. A simple method of estimating fifty percent end points.  
909 *Am J Hyg* 27, 493–497.
- 910 Rhee, S.-Y., 2003. Human immunodeficiency virus reverse transcriptase and protease  
911 sequence database. *Nucleic Acids Res.* 31, 298–303.  
912 <https://doi.org/10.1093/nar/gkg100>
- 913 Rosa, A., Chande, A., Ziglio, S., De Sanctis, V., Bertorelli, R., Goh, S.L., McCauley,  
914 S.M., Nowosielska, A., Antonarakis, S.E., Luban, J., Santoni, F.A., Pizzato, M.,  
915 2015. HIV-1 Nef promotes infection by excluding SERINC5 from virion  
916 incorporation. *Nature.* <https://doi.org/10.1038/nature15399>
- 917 Salie, Z.L., Kirby, K.A., Michailidis, E., Marchand, B., Singh, K., Rohan, L.C., Kodama,  
918 E.N., Mitsuya, H., Parniak, M.A., Sarafianos, S.G., 2016. Structural basis of HIV  
919 inhibition by translocation-defective RT inhibitor 4'-ethynyl-2-fluoro-2'-  
920 deoxyadenosine (EFdA). *Proc. Natl. Acad. Sci.* 113, 9274–9279.  
921 <https://doi.org/10.1073/pnas.1605223113>
- 922 Sarafianos, S.G., Clark, A.D., Tuske, S., Squire, C.J., Das, K., Sheng, D., Ilankumaran,  
923 P., Ramesha, A.R., Kroth, H., Sayer, J.M., Jerina, D.M., Boyer, P.L., Hughes, S.H.,  
924 Arnold, E., 2003. Trapping HIV-1 reverse transcriptase before and after



- 925 translocation on DNA. *J. Biol. Chem.* <https://doi.org/10.1074/jbc.M212911200>
- 926 Sarafianos, S.G., Das, K., Tantillo, C., Clark, A.D., Ding, J., Whitcomb, J.M., Boyer,  
927 P.L., Hughes, S.H., Arnold, E., 2001. Crystal structure of HIV-1 reverse  
928 transcriptase in complex with a polypurine tract RNA:DNA. *EMBO J.* 20, 1449–  
929 1461. <https://doi.org/10.1093/emboj/20.6.1449>
- 930 Schinazi, R.F., Lloyd, R.M., Nguyen, M.H., Cannon, D.L., McMillan, A., Ilksoy, N., Chu,  
931 C.K., Liotta, D.C., Bazmi, H.Z., Mellors, J.W., 1993. Characterization of human  
932 immunodeficiency viruses resistant to oxathiolane-cytosine nucleosides.  
933 *Antimicrob. Agents Chemother.* 37, 875–881. <https://doi.org/10.1128/AAC.37.4.875>
- 934 Schuckmann, M.M., Marchand, B., Hachiya, A., Kodama, E.N., Kirby, K.A., Singh, K.,  
935 Sarafianos, S.G., 2010. The N348I mutation at the connection subdomain of HIV-1  
936 reverse transcriptase decreases binding to nevirapine. *J. Biol. Chem.*  
937 <https://doi.org/10.1074/jbc.M110.153783>
- 938 Schuurman, R., Nijhuis, M., Van Leeuwen, R., Schipper, P., De Jong, D., Collis, P.,  
939 Danner, S.A., Mulder, J., Loveday, C., Christopherson, C., Kwok, S., Sninsky, J.,  
940 Boucher, C.A.B., 1995. Rapid changes in human immunodeficiency virus type 1 rna  
941 load and appearance of drug-resistant virus populations in persons treated with  
942 lamivudine (3tc). *J. Infect. Dis.* 171, 1411–1419.  
943 <https://doi.org/10.1093/infdis/171.6.1411>
- 944 Shanmugasundaram, U., Kovarova, M., Ho, P.T., Schramm, N., Wahl, A., Parniak,  
945 M.A., Garcia, J.V., 2016. Efficient inhibition of HIV replication in the gastrointestinal  
946 and female reproductive tracts of humanized BLT mice by EFdA. *PLoS One* 11,  
947 e0159517. <https://doi.org/10.1371/journal.pone.0159517>
- 948 Singh, K., Marchand, B., Rai, D.K., Sharma, B., Michailidis, E., Ryan, E.M., Matzek,  
949 K.B., Leslie, M.D., Hagedorn, A.N., Li, Z., Norden, P.R., Hachiya, A., Parniak, M.A.,  
950 Xu, H.T., Wainberg, M.A., Sarafianos, S.G., 2012. Biochemical mechanism of HIV-  
951 1 resistance to rilpivirine. *J. Biol. Chem.* <https://doi.org/10.1074/jbc.M112.398180>
- 952 Sohl, C.D., Singh, K., Kasiviswanathan, R., Copeland, W.C., Mitsuya, H., Sarafianos,  
953 S.G., Anderson, K.S., 2012. Mechanism of interaction of human mitochondrial DNA  
954 polymerase  $\gamma$  with the novel nucleoside reverse transcriptase inhibitor 4'-ethynyl-2-  
955 fluoro- 2'-deoxyadenosine indicates a low potential for host toxicity. *Antimicrob.*  
956 *Agents Chemother.* 56, 1630–1634. <https://doi.org/10.1128/AAC.05729-11>
- 957 Stoddart, C.A., Galkina, S.A., Joshi, P., Kosikova, G., Moreno, M.E., Rivera, J.M.,  
958 Sloan, B., Reeve, A.B., Sarafianos, S.G., Murphey-Corb, M., Parniak, M.A., 2015.  
959 Oral administration of the nucleoside EFdA (4'-ethynyl-2-fluoro-2'-deoxyadenosine)  
960 provides rapid suppression of HIV viremia in humanized mice and favorable  
961 pharmacokinetic properties in mice and the rhesus macaque. *Antimicrob. Agents*  
962 *Chemother.* 59, 4190–4198. <https://doi.org/10.1128/AAC.05036-14>
- 963 Tachedjian, G., Aronson, H.E.G., De Los Santos, M., Seehra, J., McCoy, J.M., Goff,  
964 S.P., 2003. Role of residues in the tryptophan repeat motif for HIV-1 reverse  
965 transcriptase dimerization. *J. Mol. Biol.* 326, 381–396.  
966 [https://doi.org/10.1016/S0022-2836\(02\)01433-X](https://doi.org/10.1016/S0022-2836(02)01433-X)

- 967 Tachedjian, G., French, M., Mills, J., 1998. Coresistance to zidovudine and foscarnet is  
968 associated with multiple mutations in the human immunodeficiency virus type 1  
969 reverse transcriptase. *Antimicrob. Agents Chemother.* 42, 3038–3043.
- 970 Takeuchi, Y., McClure, M.O., Pizzato, M., 2008. Identification of Gammaretroviruses  
971 Constitutively Released from Cell Lines Used for Human Immunodeficiency Virus  
972 Research. *J. Virol.* <https://doi.org/10.1128/jvi.01726-08>
- 973 Tang, J., Do, H.T., Huber, A.D., Casey, M.C., Kirby, K.A., Wilson, D.J., Kankanala, J.,  
974 Parniak, M.A., Sarafianos, S.G., Wang, Z., 2019. Pharmacophore-based design of  
975 novel 3-hydroxypyrimidine-2,4-dione subtypes as inhibitors of HIV reverse  
976 transcriptase-associated RNase H: Tolerance of a nonflexible linker. *Eur. J. Med.*  
977 *Chem.* <https://doi.org/10.1016/j.ejmech.2019.01.081>
- 978 Tang, J., Kirby, K.A., Huber, A.D., Casey, M.C., Ji, J., Wilson, D.J., Sarafianos, S.G.,  
979 Wang, Z., 2017. 6-Cyclohexylmethyl-3-hydroxypyrimidine-2,4-dione as an inhibitor  
980 scaffold of HIV reverse transcriptase: Impacts of the 3-OH on inhibiting RNase H  
981 and polymerase. *Eur. J. Med. Chem.* <https://doi.org/10.1016/j.ejmech.2017.01.041>
- 982 Tisdale, M., Kemp, S.D., Parry, N.R., Larder, B.A., 1993. Rapid in vitro selection of  
983 human immunodeficiency virus type 1 resistant to 3'-thiacytidine inhibitors due to a  
984 mutation in the YMDD region of reverse transcriptase. *Proc. Natl. Acad. Sci.* 90,  
985 5653–5656. <https://doi.org/10.1073/pnas.90.12.5653>
- 986 Van Cor-Hosmer, S.K., Daddacha, W., Kelly, Z., Tsurumi, A., Kennedy, E.M., Kim, B.,  
987 2012. The impact of molecular manipulation in residue 114 of human  
988 immunodeficiency virus type-1 reverse transcriptase on dNTP substrate binding  
989 and viral replication. *Virology* 422, 393–401.  
990 <https://doi.org/10.1016/j.virol.2011.11.004>
- 991 Vernekar, S.K. V., Tang, J., Wu, B., Huber, A.D., Casey, M.C., Myshakina, N., Wilson,  
992 D.J., Kankanala, J., Kirby, K.A., Parniak, M.A., Sarafianos, S.G., Wang, Z., 2017.  
993 Double-Winged 3-Hydroxypyrimidine-2,4-diones: Potent and Selective Inhibition  
994 against HIV-1 RNase H with Significant Antiviral Activity. *J. Med. Chem.*  
995 <https://doi.org/10.1021/acs.jmedchem.7b00440>
- 996 von Wyl, V., Ehteshami, M., Demeter, L.M., Bürgisser, P., Nijhuis, M., Symons, J.,  
997 Yerly, S., Böni, J., Klimkait, T., Schuurman, R., Ledergerber, B., Götte, M.,  
998 Günthard, H.F., 2010. HIV-1 Reverse Transcriptase Connection Domain Mutations:  
999 Dynamics of Emergence and Implications for Success of Combination Antiretroviral  
1000 Therapy. *Clin. Infect. Dis.* 51, 620–628. <https://doi.org/10.1086/655764>
- 1001 Wainberg, M.A., Zaharatos, G.J., Brenner, B.G., 2011. Development of Antiretroviral  
1002 Drug Resistance. *N. Engl. J. Med.* <https://doi.org/10.1056/nejmra1004180>
- 1003 Wainburg, M.A., 2004. The impact of the M184V substitution on drug resistance and  
1004 viral fitness. *Expert Rev. Anti. Infect. Ther.* 2, 147–151.  
1005 <https://doi.org/10.1586/14787210.2.1.147>
- 1006 Wang, L., Tang, J., Huber, A.D., Casey, M.C., Kirby, K.A., Wilson, D.J., Kankanala, J.,  
1007 Parniak, M.A., Sarafianos, S.G., Wang, Z., 2018. 6-Biphenylmethyl-3-

- 1008 hydroxypyrimidine-2,4-diones potently and selectively inhibited HIV reverse  
1009 transcriptase-associated RNase H. *Eur. J. Med. Chem.*  
1010 <https://doi.org/10.1016/j.ejmech.2018.07.035>
- 1011 Wei, X., Decker, J.M., Liu, H., Zhang, Z., Arani, R.B., Kilby, J.M., Saag, M.S., Wu, X.,  
1012 Shaw, G.M., Kappes, J.C., 2002. Emergence of resistant human immunodeficiency  
1013 virus type 1 in patients receiving fusion inhibitor (T-20) monotherapy. *Antimicrob.*  
1014 *Agents Chemother.* <https://doi.org/10.1128/AAC.46.6.1896-1905.2002>
- 1015 Wu, V.H., Smith, R.A., Masoum, S., Raugi, D.N., Ba, S., Seydi, M., Grobler, J.A.,  
1016 Gottlieb, G.S., 2017. MK-8591 (4'-ethynyl-2-fluoro-2'-deoxyadenosine) exhibits  
1017 potent activity against HIV-2 isolates and drug-resistant HIV-2 mutants in culture.  
1018 *Antimicrob. Agents Chemother.* 61, e00744-17. [https://doi.org/10.1128/AAC.00744-](https://doi.org/10.1128/AAC.00744-17)  
1019 17
- 1020 Xu, H.-T., Asahchop, E.L., Oliveira, M., Quashie, P.K., Quan, Y., Brenner, B.G.,  
1021 Wainberg, M.A., 2011. Compensation by the E138K Mutation in HIV-1 Reverse  
1022 Transcriptase for Deficits in Viral Replication Capacity and Enzyme Processivity  
1023 Associated with the M184I/V Mutations. *J. Virol.* 85, 11300–11308.  
1024 <https://doi.org/10.1128/JVI.05584-11>
- 1025 Yang, G., Wang, J., Cheng, Y., Dutschman, G.E., Tanaka, H., Baba, M., Cheng, Y.C.,  
1026 2008. Mechanism of inhibition of human immunodeficiency virus type 1 reverse  
1027 transcriptase by a stavudine analogue, 4'-ethynyl stavudine triphosphate.  
1028 *Antimicrob. Agents Chemother.* 52, 2035–2042.  
1029 <https://doi.org/10.1128/AAC.00083-08>
- 1030 Zhang, D., Caliendo, A.M., Eron, J.J., DeVore, K.M., Kaplan, J.C., Hirsch, M.S.,  
1031 D'Aquila, R.T., 1994. Resistance to 2',3'-dideoxycytidine conferred by a mutation in  
1032 codon 65 of the human immunodeficiency virus type 1 reverse transcriptase.  
1033 *Antimicrob. Agents Chemother.* 38, 282–287. <https://doi.org/10.1128/AAC.38.2.282>
- 1034  
1035
